# Supplementary material for: An insight into the route from CO2 fixation to CO32−-bridged dinuclear lanthanide(iii) complexes featuring inner coordination post-synthetic modification
Source: Royal Society of Chemistry journal article supplement (doi:10.1039/d4dt03050h), 2025-01-01
Supplement: d4dt03050h1.pdf [file d4dt03050h1.pdf]

# **An insight *en-route* from CO<sub>2</sub> fixation to CO<sub>3</sub><sup>2-</sup>-bridged dinuclear lanthanide(III) complexes featuring inner coordination post-synthetic modification**

*Vaibhav Singh, Vajeetha Urunikulavan, and Arun Kumar Bar\*<sup>[a]</sup>*

<sup>a</sup>Indian Institute of Science Education and Research Tirupati, Tirupat-517507, AP, India.

E-mail: [a.bar@iisertirupati.ac.in](mailto:a.bar@iisertirupati.ac.in)

---

---

***SUPPORTING INFORMATION***

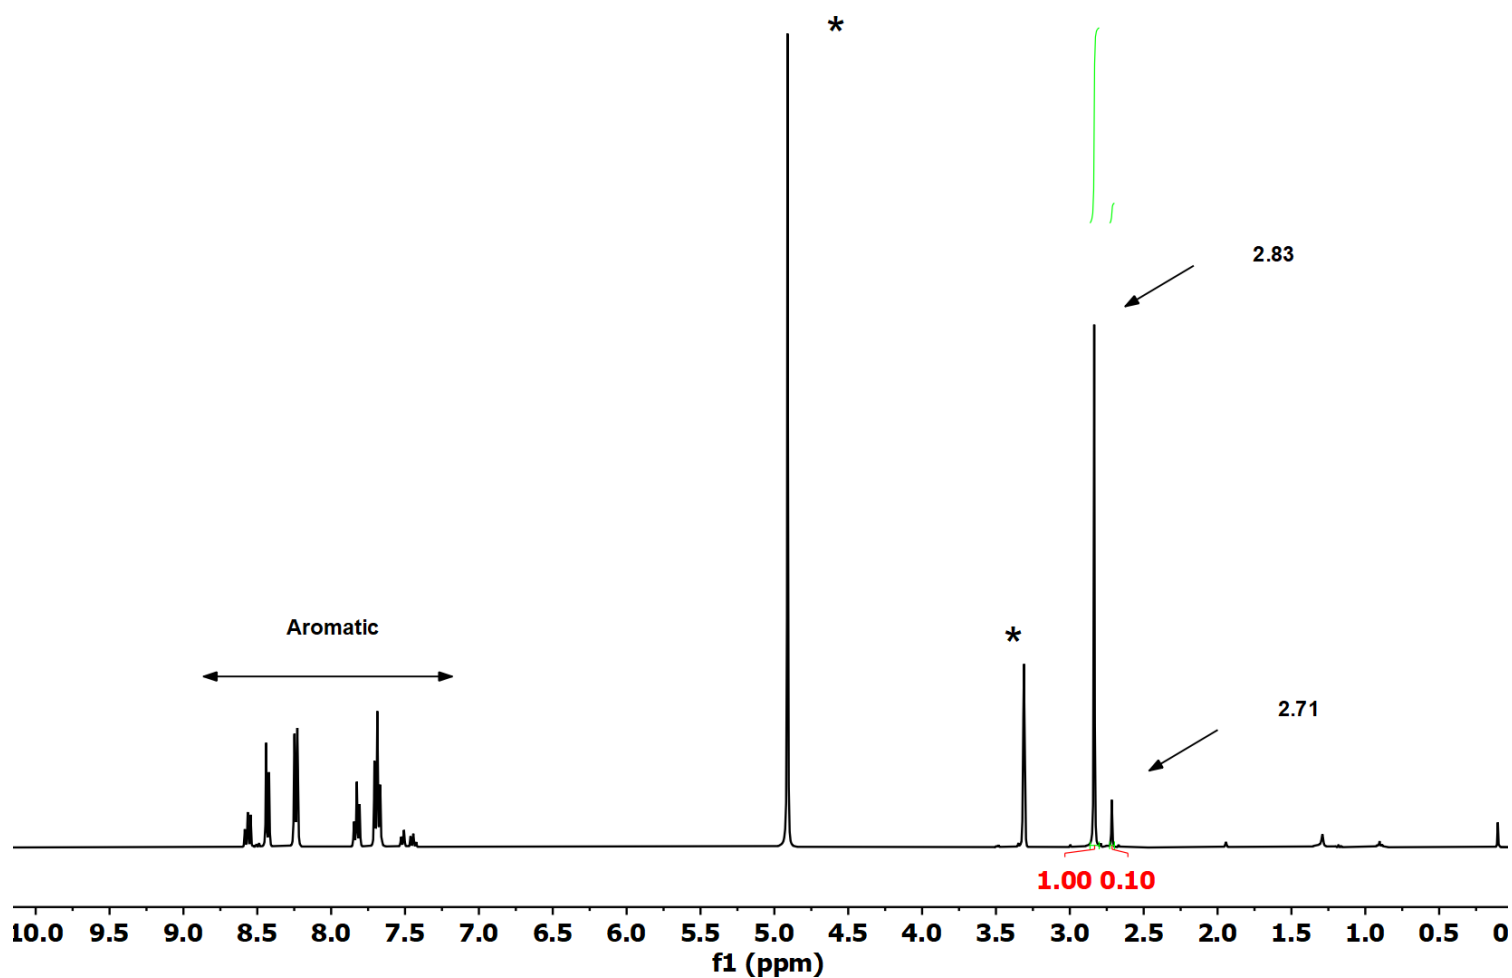

**Figure S1:** The room temperature solution  $^1\text{H}$  NMR spectra of the reaction between  $\text{Y}(\text{OTf})_3$  and  $\text{H}_2\text{L}$  in 1:1 equivalency (recorded in  $\text{CD}_3\text{OD}$ ). The solvent peaks/grease are indicated by asterisks.

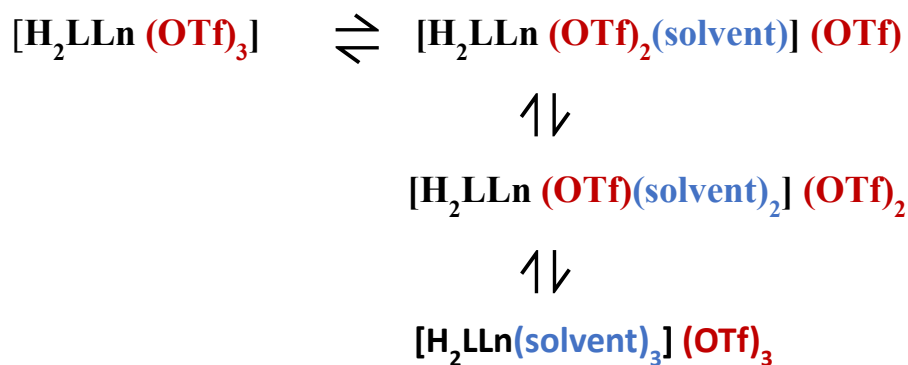

**Scheme S1:** The possible products resulting from the reaction between  $\text{H}_2\text{L}$  and  $\text{Y}(\text{OTf})_3$  in a 1:1 equivalency.

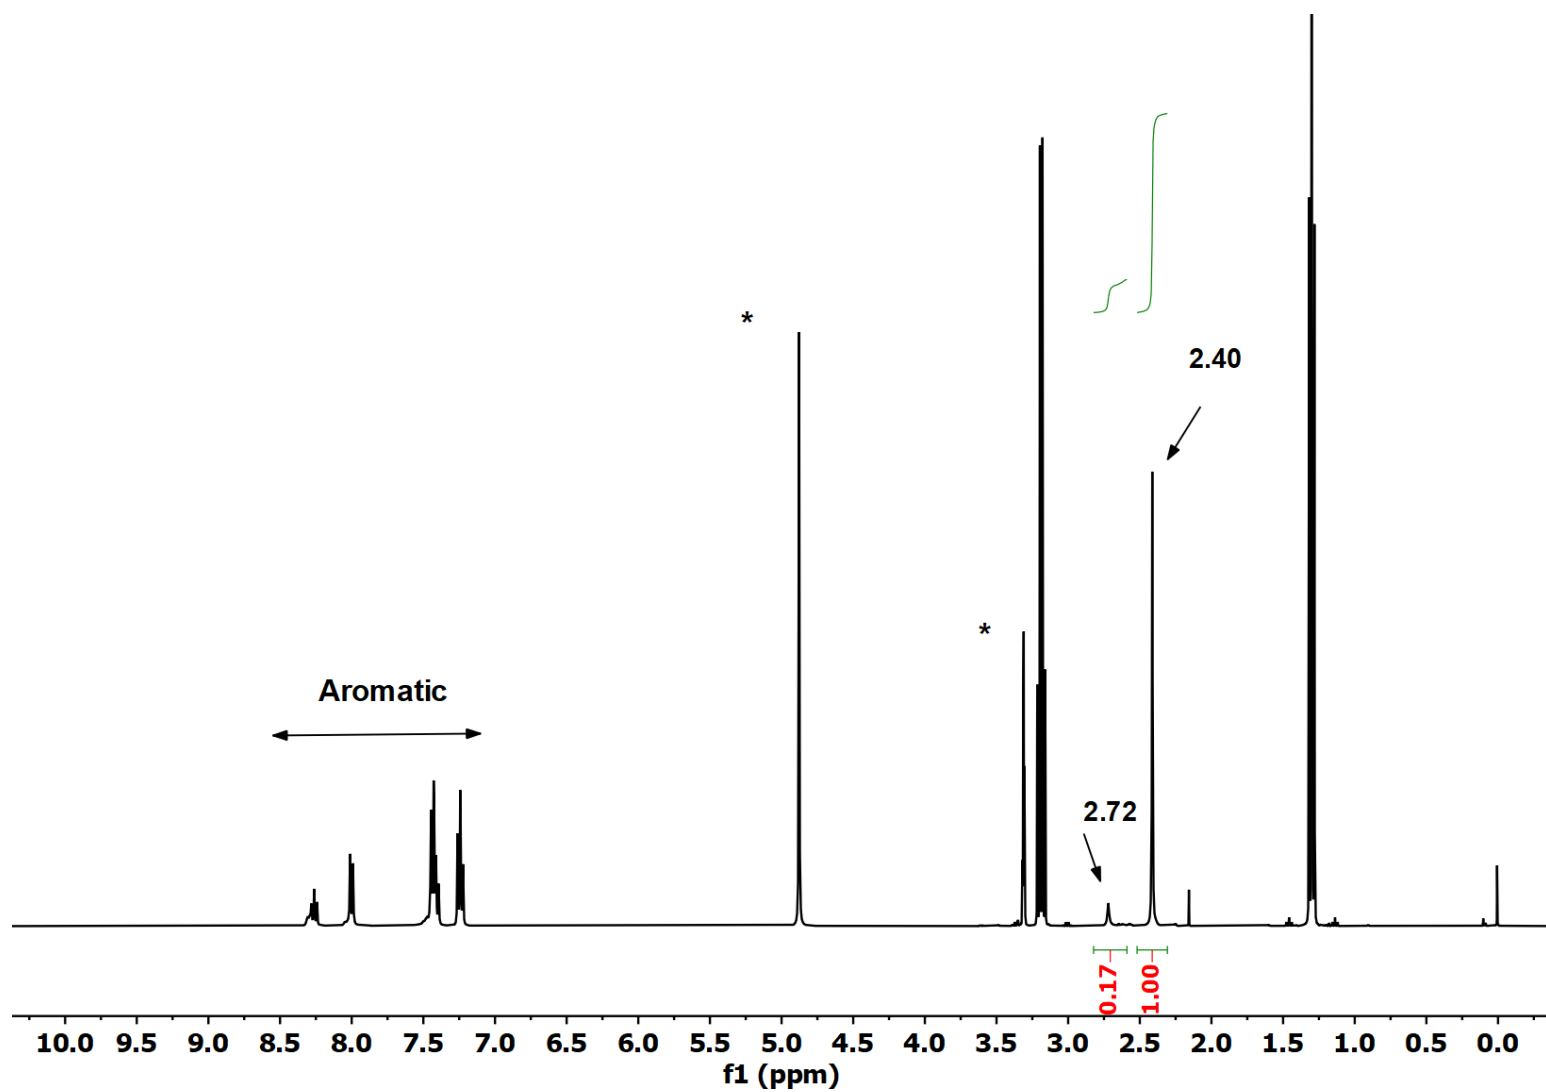

**Figure S2:** The room temperature solution  $^1\text{H}$  NMR spectra of the reaction between  $\text{Y}(\text{OTf})_3$ ,  $\text{H}_2\text{L}$  and  $\text{NEt}_3$  in 1:1:2 equivalency (recorded in  $\text{CD}_3\text{OD}$ ). The solvent peaks/grease are indicated by asterisks.

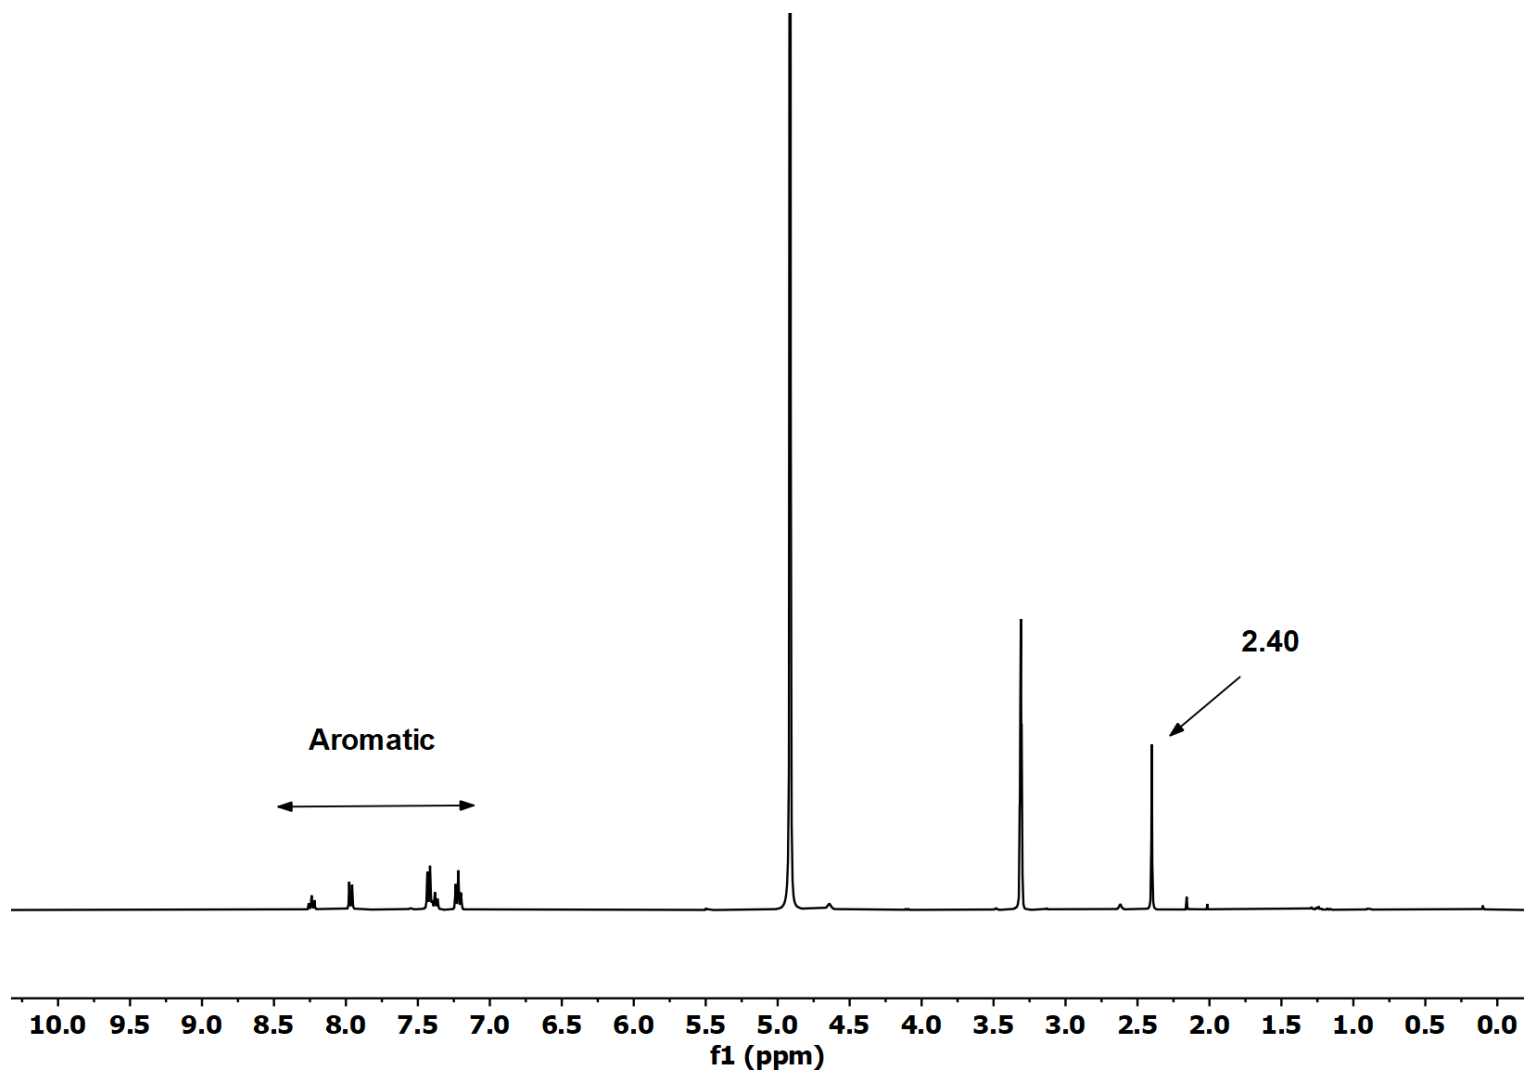

**Figure S3:** The room temperature solution  $^1\text{H}$  NMR spectra of the isolated crystals of **4·Y** in  $\text{CD}_3\text{OD}$ . The solvent peaks/grease are indicated by asterisks

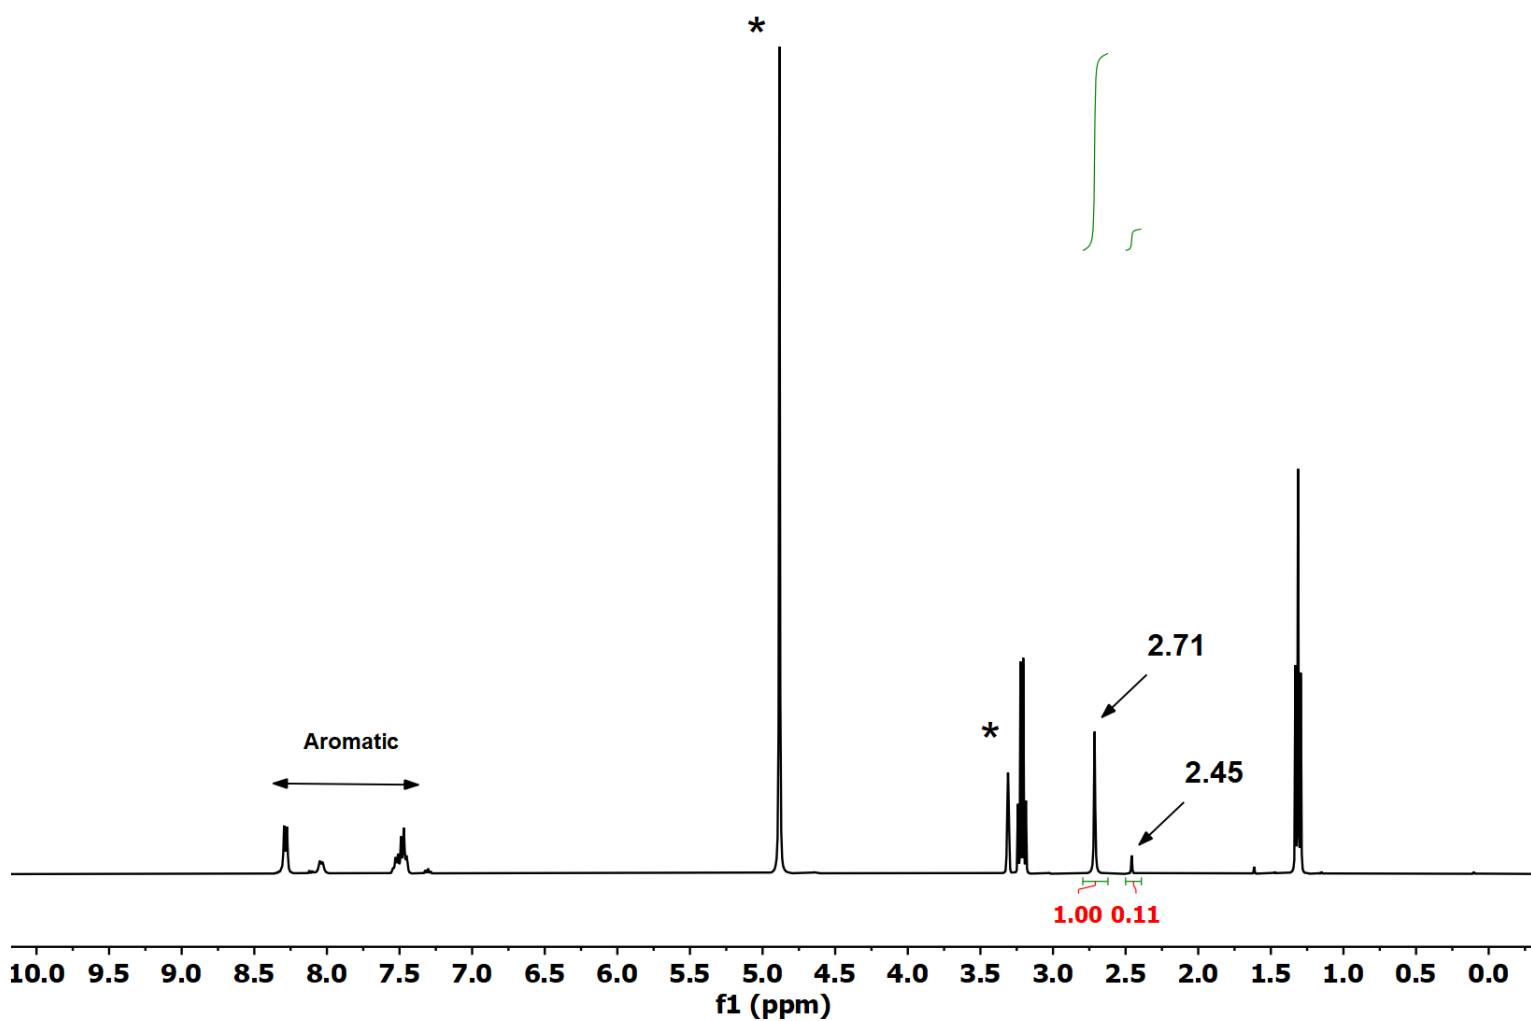

**Figure S4:** The room temperature solution  $^1\text{H}$  NMR spectra of the reaction between  $\text{Y}(\text{OTf})_3$ ,  $\text{H}_2\text{L}$  and  $\text{NEt}_3$  in 1:1:2 equivalency, followed by purging of  $\text{CO}_2$  gas (recorded in  $\text{CD}_3\text{OD}$ ). The solvent peaks/grease are indicated by asterisks.

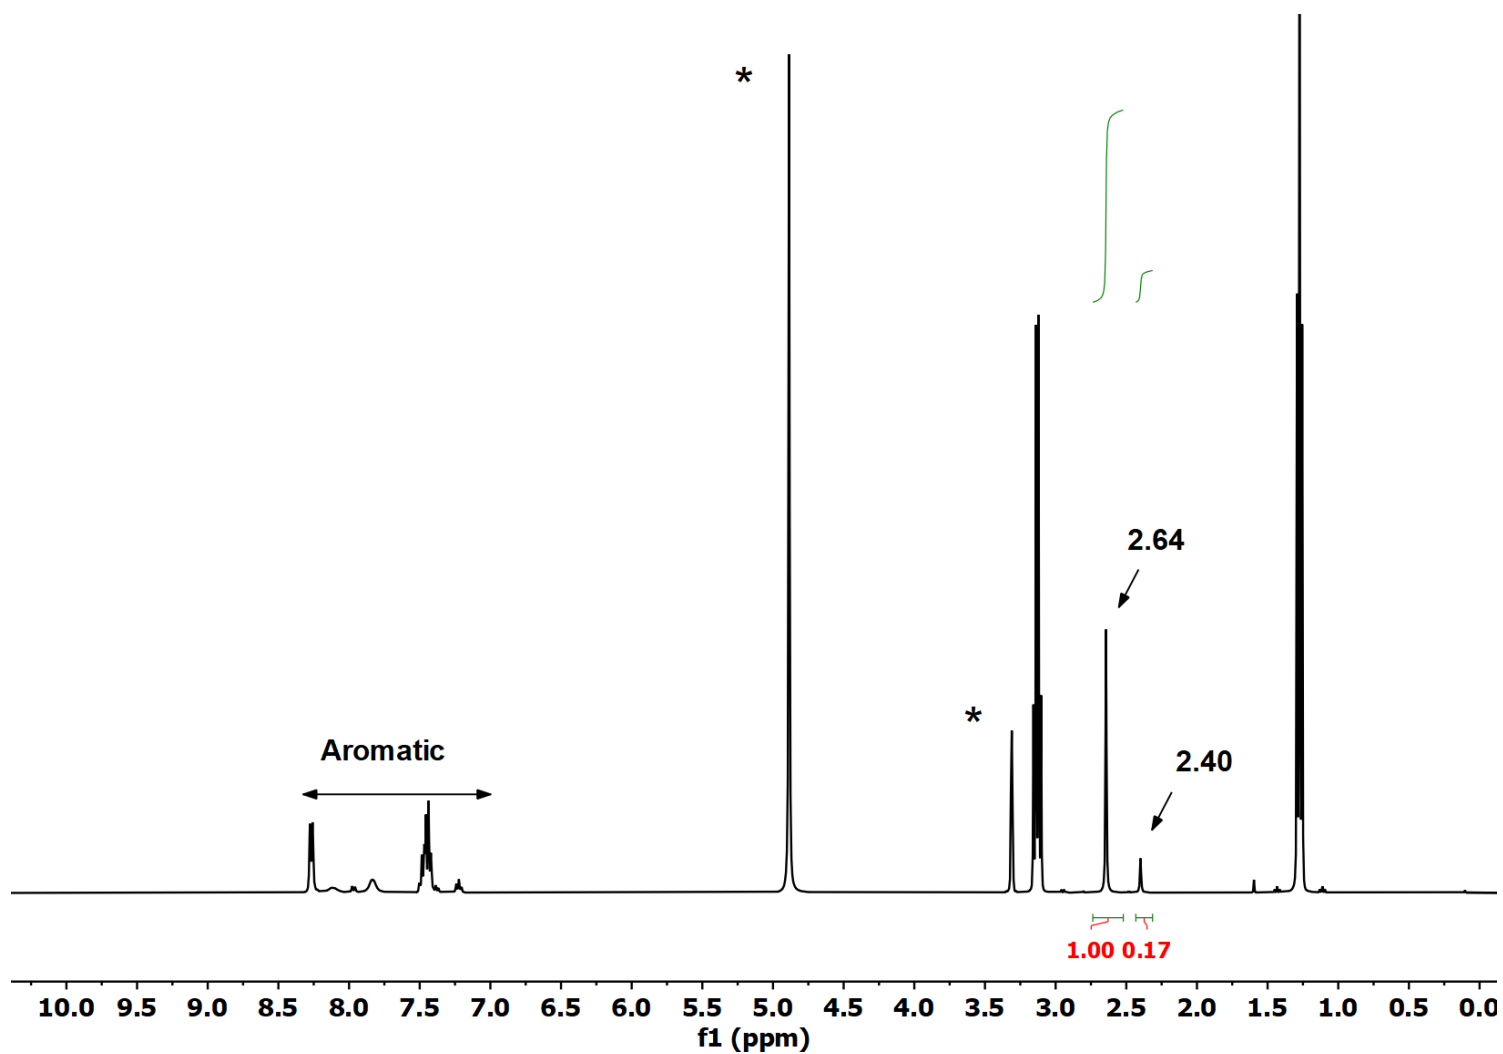

**Figure S5:** The room temperature solution  $^1\text{H}$  NMR spectra of the reaction between  $\text{Y}(\text{OTf})_3$ ,  $\text{H}_2\text{L}$  and  $\text{NEt}_3$  in 1:1:3 equivalency, followed by purging of  $\text{CO}_2$  gas (recorded in  $\text{CD}_3\text{OD}$ ). The solvent peaks/grease are indicated by asterisks.

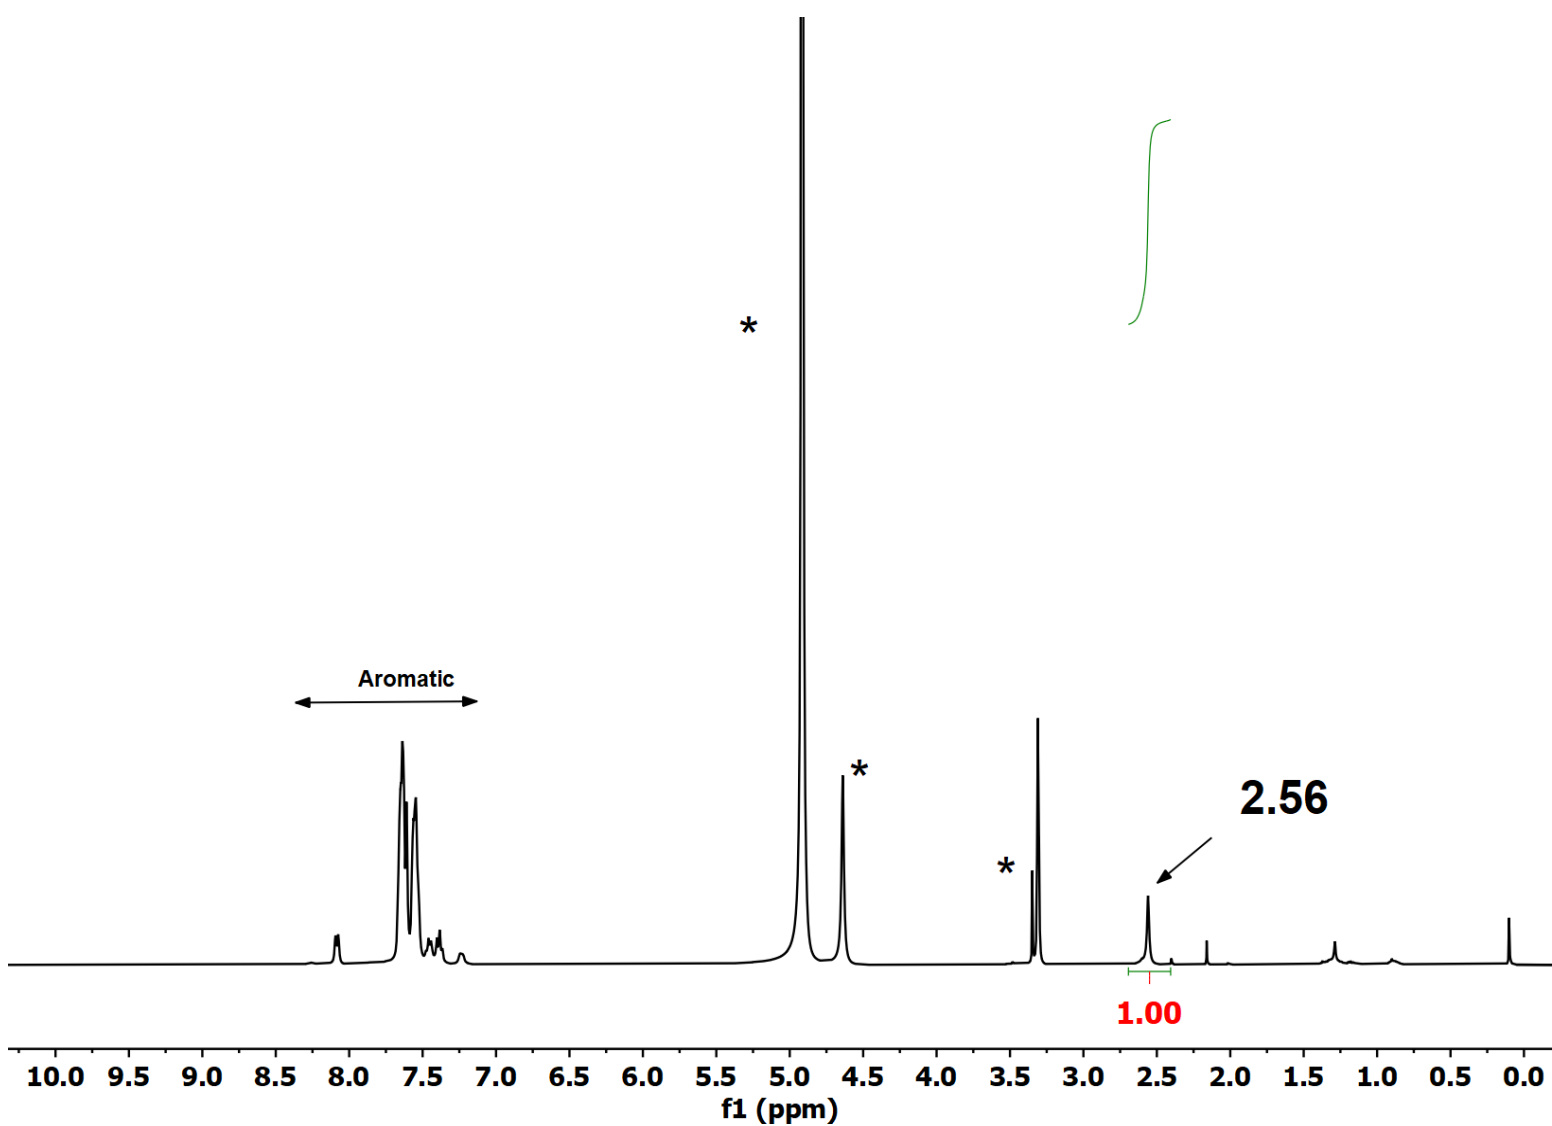

**Figure S6:** The room temperature solution  $^1\text{H}$  NMR spectra of the reaction between gelatinous ppt. and  $\text{CO}_2$  gas followed by addition of 2eq of TPPO (recorded in  $\text{CD}_3\text{OD}$ ). The solvent peaks/grease are indicated by asterisks.

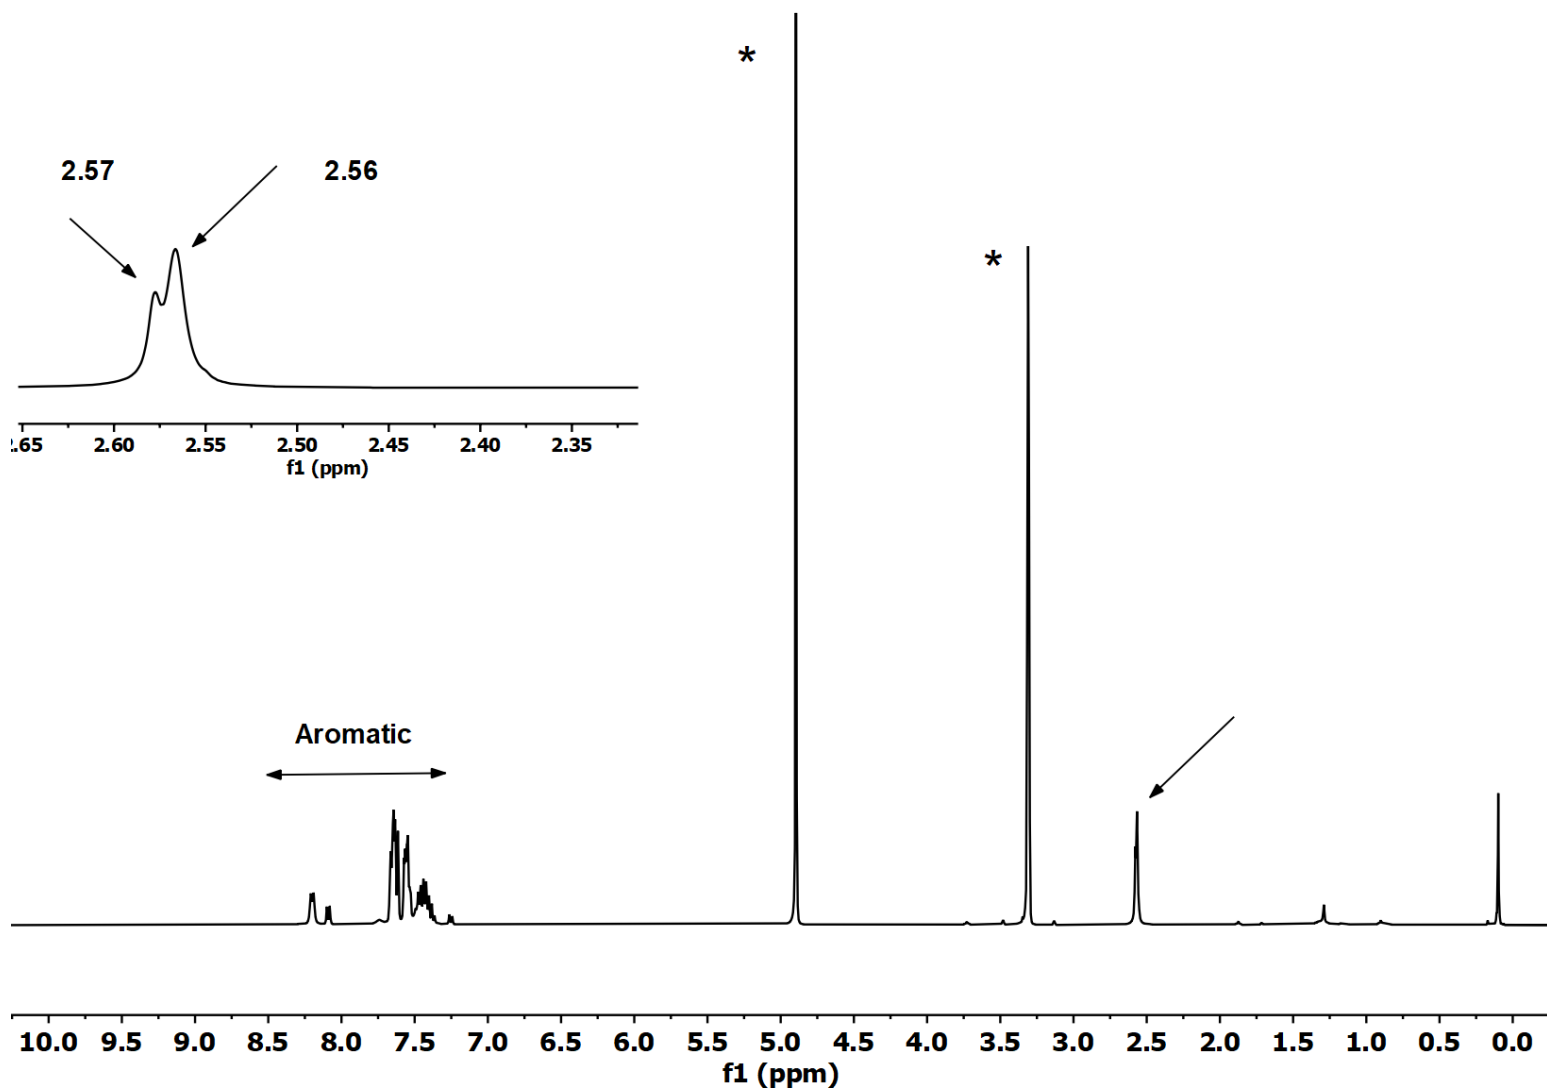

**Figure S7:** NMR signal for the doubly substituted phosphine oxide (2.56 ppm) analogues equilibrating with corresponding singly substituted phosphine oxide congeners (2.57 ppm). The solvent peaks/grease are indicated by asterisks.



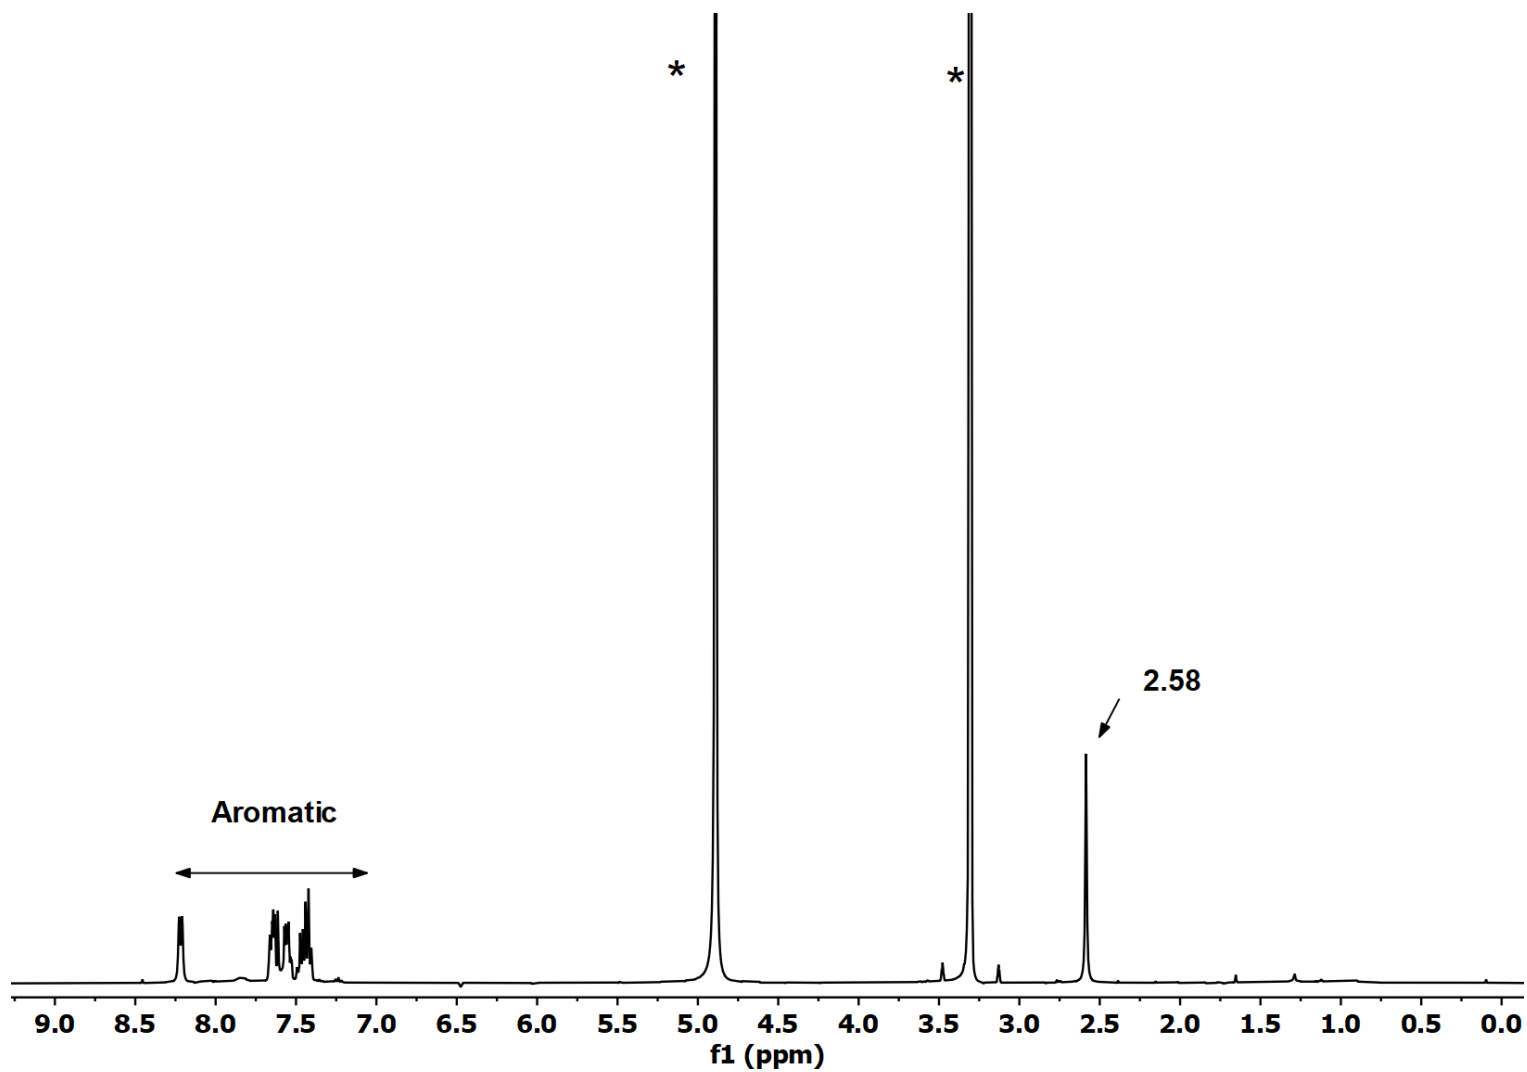

**Figure S8:** The room temperature solution  $^1\text{H}$  NMR spectra of the isolated crystals of **5·Y** in  $\text{CD}_3\text{OD}$ . The solvent peaks/grease are indicated by asterisks

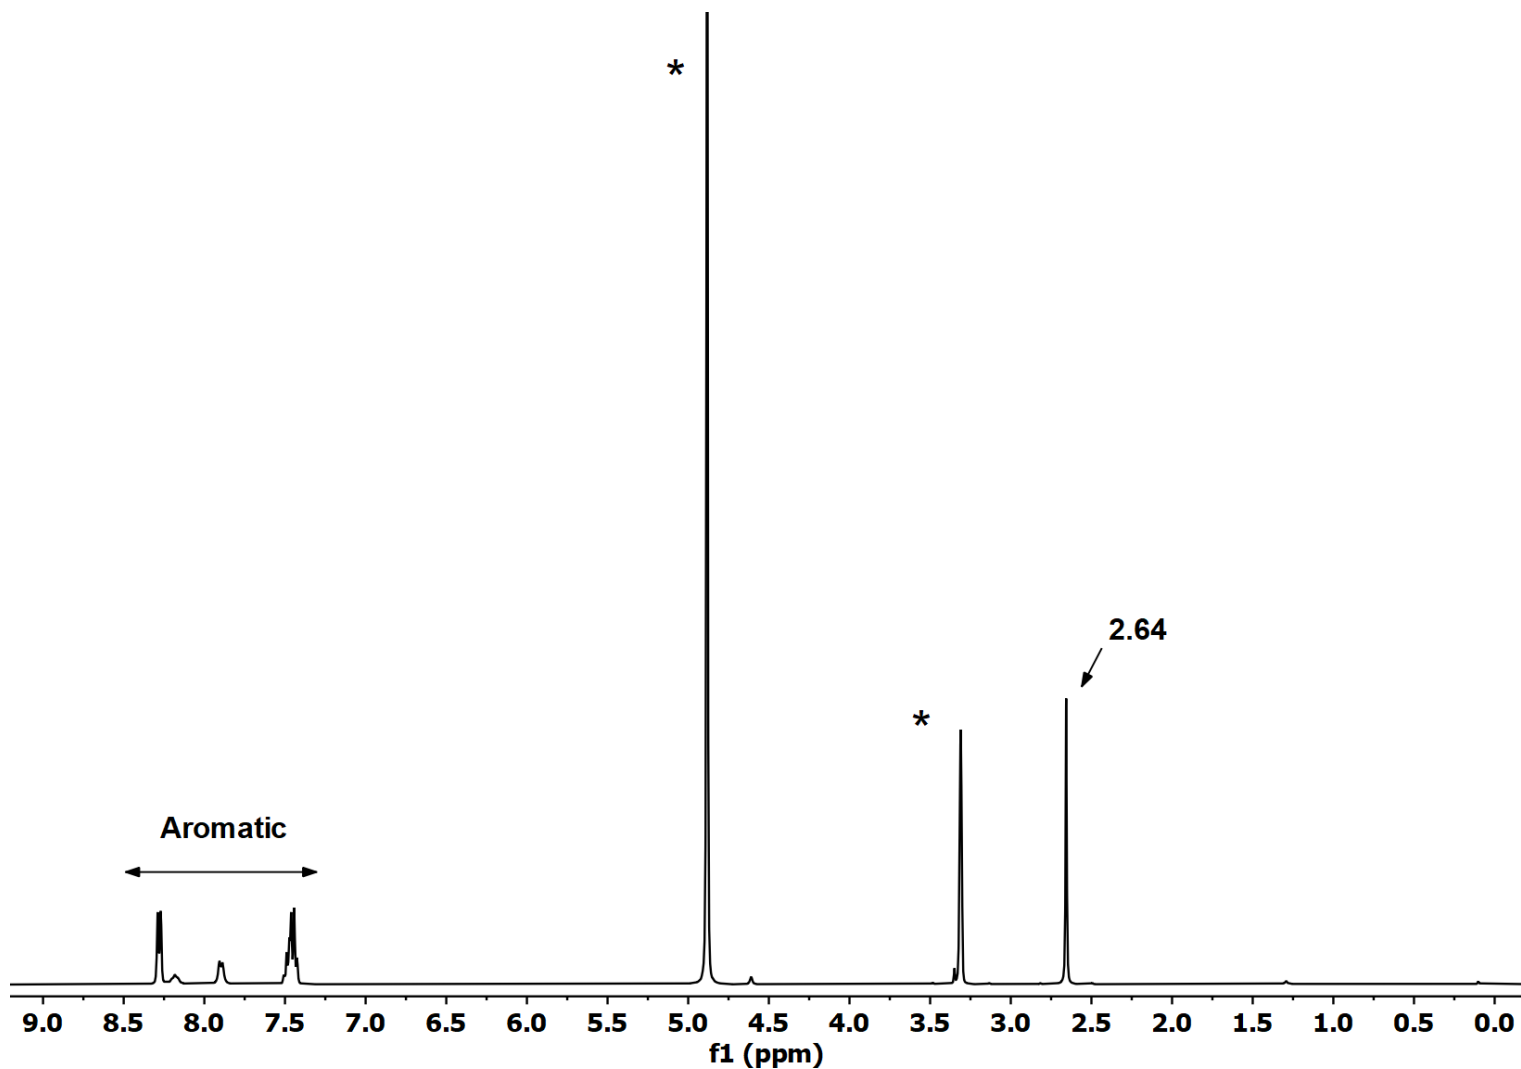

**Figure S9:** The room temperature solution  $^1\text{H}$  NMR spectra of the isolated crystals of **2·Y** in  $\text{CD}_3\text{OD}$ . The solvent peaks/grease are indicated by asterisks

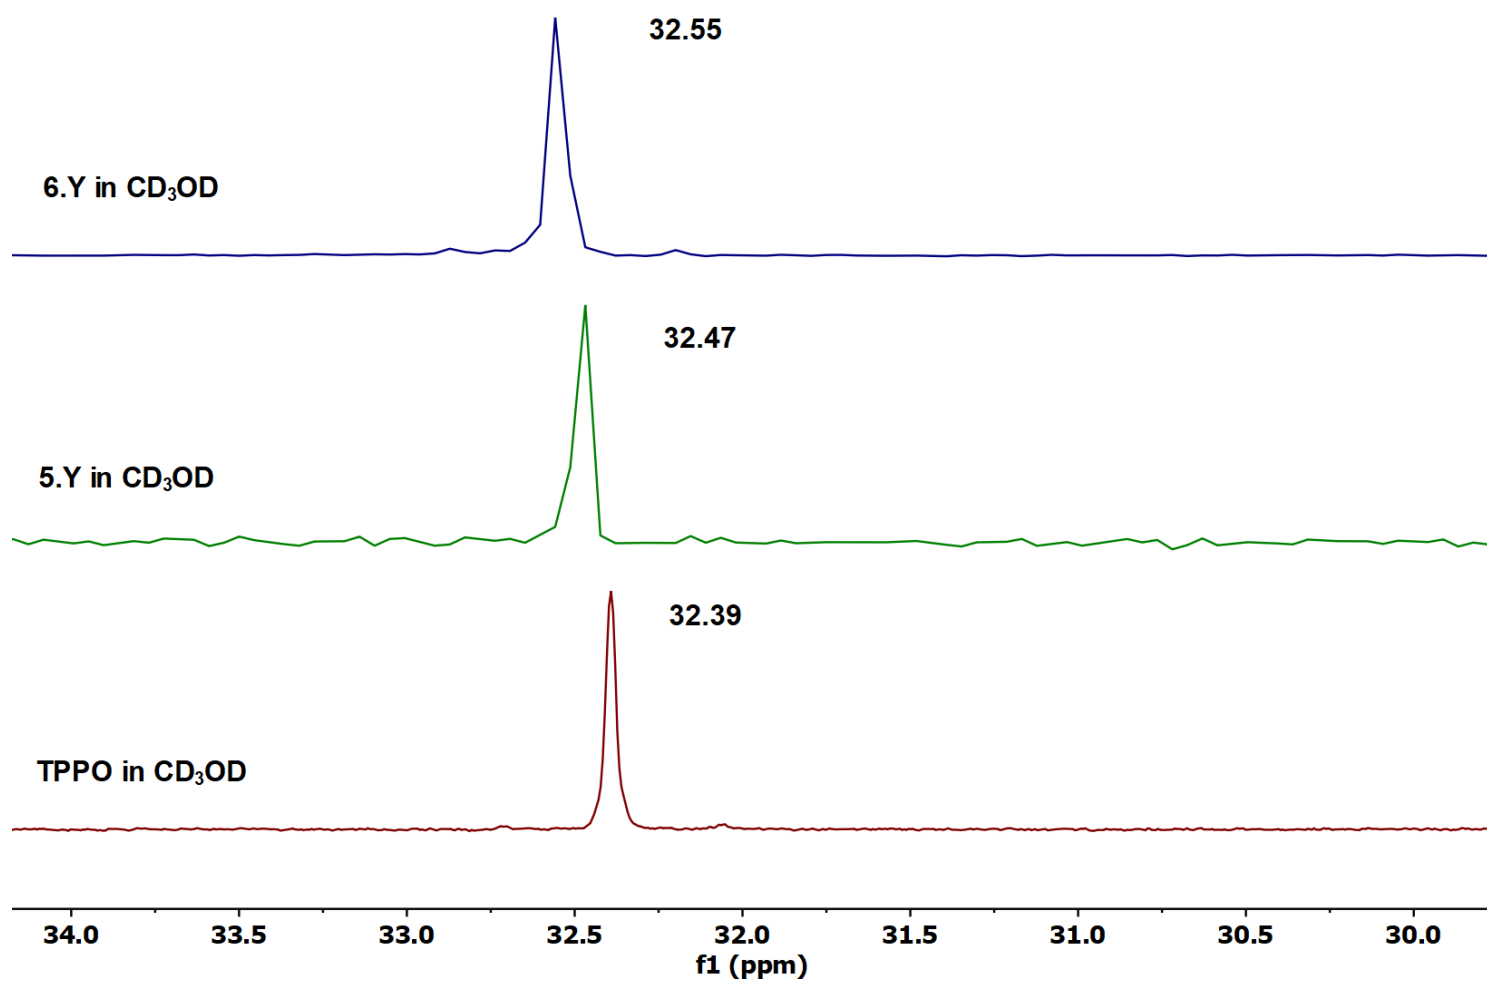

**Figure S10:** The comparative  $^{31}\text{P}$  NMR spectra of TPPO (red), 5·Y(green), and 6·Y(blue) recorded in CD<sub>3</sub>OD solution at room temperature.

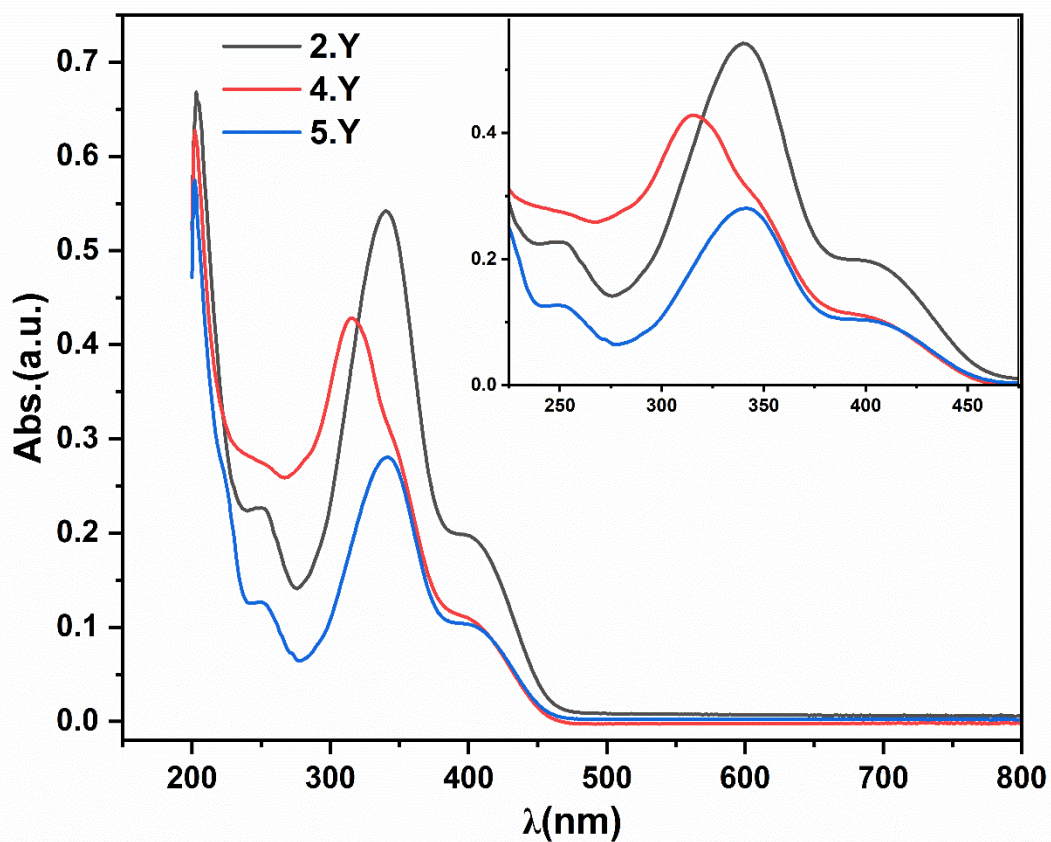

**Figure S11:** The comparative UV-Vis absorption spectra of the methanolic solutions ( $10\mu\text{M}$ ) of  $2\cdot\text{Y}$  (black),  $4\cdot\text{Y}$  (red), and  $5\cdot\text{Y}$  (blue), recorded at room temperature. The insets are the zoomed-in absorptions in the 225-475 nm regions.

**Table S1:** The absorption maxima ( $\lambda_{max}^{abs}$ ) and the corresponding molar extinction coefficients for the as-synthesized complexes in MeOH under ambient conditions.

|                  | $\lambda_{max}^{abs}(nm)$ |     |     |     | $\epsilon(\text{M}^{-1}\text{cm}^{-1})$ |       |       |       |
|------------------|---------------------------|-----|-----|-----|-----------------------------------------|-------|-------|-------|
| $2\cdot\text{Y}$ | 392                       | 340 | 250 | 203 | 20000                                   | 54200 | 22600 | 67000 |
| $5\cdot\text{Y}$ | 392                       | 342 | 249 | 202 | 11000                                   | 28000 | 12700 | 57400 |
| $4\cdot\text{Y}$ | 392                       | 315 | 202 |     | 11300                                   | 42800 | 62700 |       |

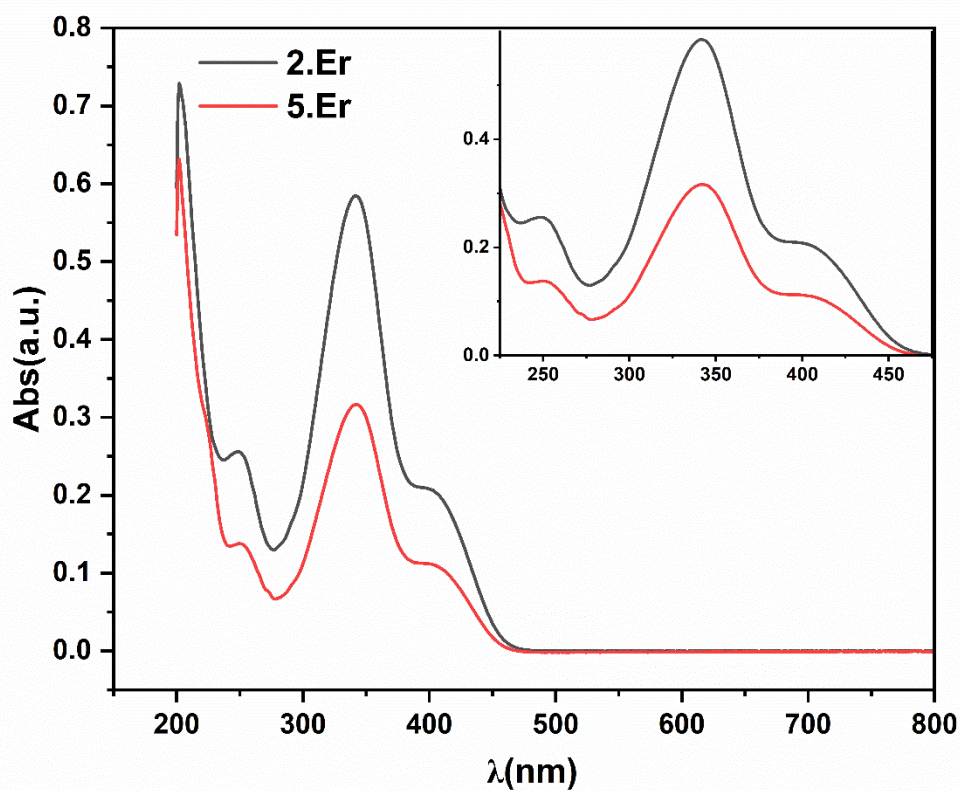

**Figure S12:** The comparative UV-Vis absorption spectra of the methanolic solutions (10 $\mu$ M) of **2·Er** (black), and **5·Er** (red), recorded at room temperature. The insets are the zoomed-in absorptions in the 225-475 nm regions

**Table S2:** The absorption maxima ( $\lambda_{max}^{abs}$ ) and the corresponding molar extinction coefficients for the as-synthesized complexes in MeOH under ambient conditions.

|             | $\lambda_{max}^{abs}(nm)$ |     |     |     | $\epsilon(M^{-1}cm^{-1})$ |       |       |       |
|-------------|---------------------------|-----|-----|-----|---------------------------|-------|-------|-------|
|             |                           |     |     |     |                           |       |       |       |
| <i>2·Er</i> | 392                       | 341 | 249 | 203 | 21000                     | 58000 | 26000 | 72300 |
| <i>5·Er</i> | 392                       | 342 | 250 | 202 | 11200                     | 31600 | 13800 | 61300 |

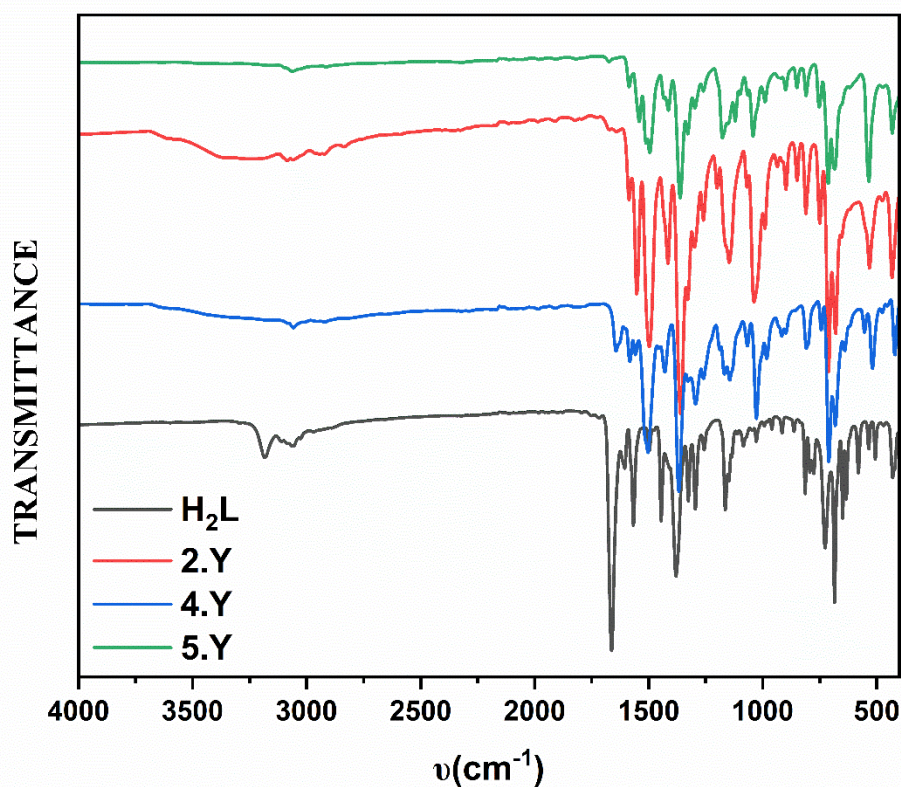

**Figure S13.** Comparative solid-state FT-IR spectra of the Schiff base ligands **H<sub>2</sub>L** (black) and the Y analogues **2·Y** (red), **4·Y** (blue) and **5·Y** (green) recorded at room temperature.

**Table S3:** The characteristic stretching frequencies corresponding to the C=O and C=N functional groups in the Schiff base ligand and in the complexes. The assignment of the stretching frequencies is based on the reported literature.

| Compound              | $\nu_{C=O}(\text{cm}^{-1})$ | $\nu_{C=N}(\text{cm}^{-1})$ |
|-----------------------|-----------------------------|-----------------------------|
| <b>H<sub>2</sub>L</b> | 1662(vs),1605(m)            | 1567(s)                     |
| <b>2·Y</b>            | 1552(s)                     | 1640(w),1586(m)             |
| <b>4·Y</b>            | 1558(m)                     | 1644(w),1582(m)             |
| <b>5·Y</b>            | 1542(m)                     | 1670(w),1586(m)             |

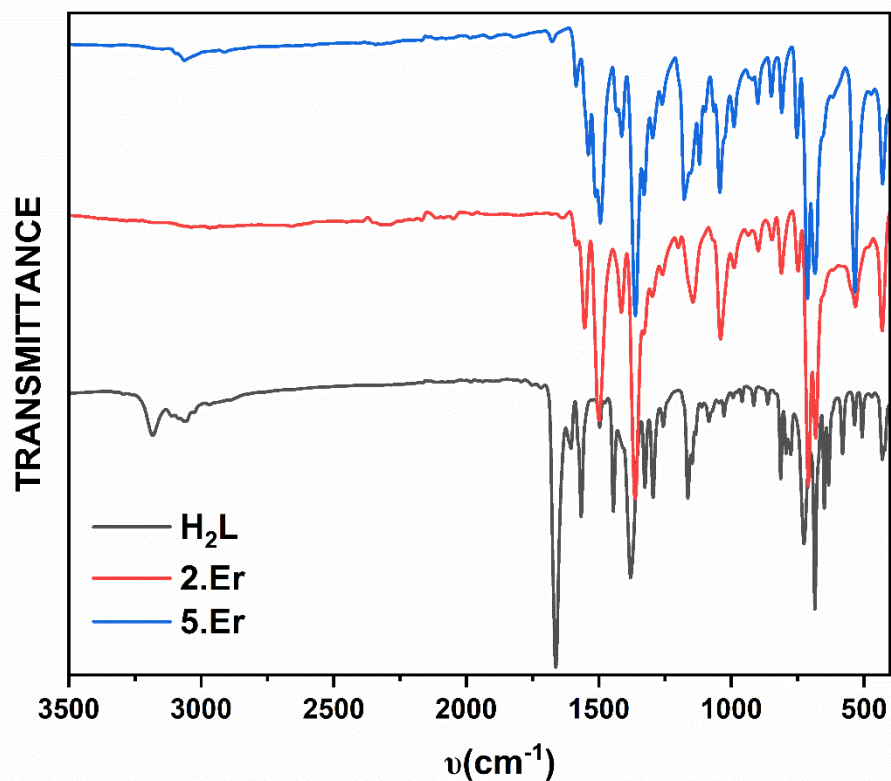

**Figure S14.** Comparative solid-state FT-IR spectra of the Schiff base ligands **H<sub>2</sub>L** (black) and the Er analogues **2·Er** (red) and **5·Er** (blue) recorded at room temperature.

**Table S4:** The characteristic stretching frequencies corresponding to the C=O and C=N functional groups in the Schiff base ligand and in the complexes. The assignment of the stretching frequencies is based on the reported literature.

| Compound              | $\nu_{\text{C=O}}(\text{cm}^{-1})$ | $\nu_{\text{C=N}}(\text{cm}^{-1})$ |
|-----------------------|------------------------------------|------------------------------------|
| <b>H<sub>2</sub>L</b> | 1662(vs),1605(m)                   | 1567(s)                            |
| <b>2·Er</b>           | 1554(s)                            | 1634(w),1586(m)                    |
| <b>5·Er</b>           | 1540(m)                            | 1670(w),1586(m)                    |

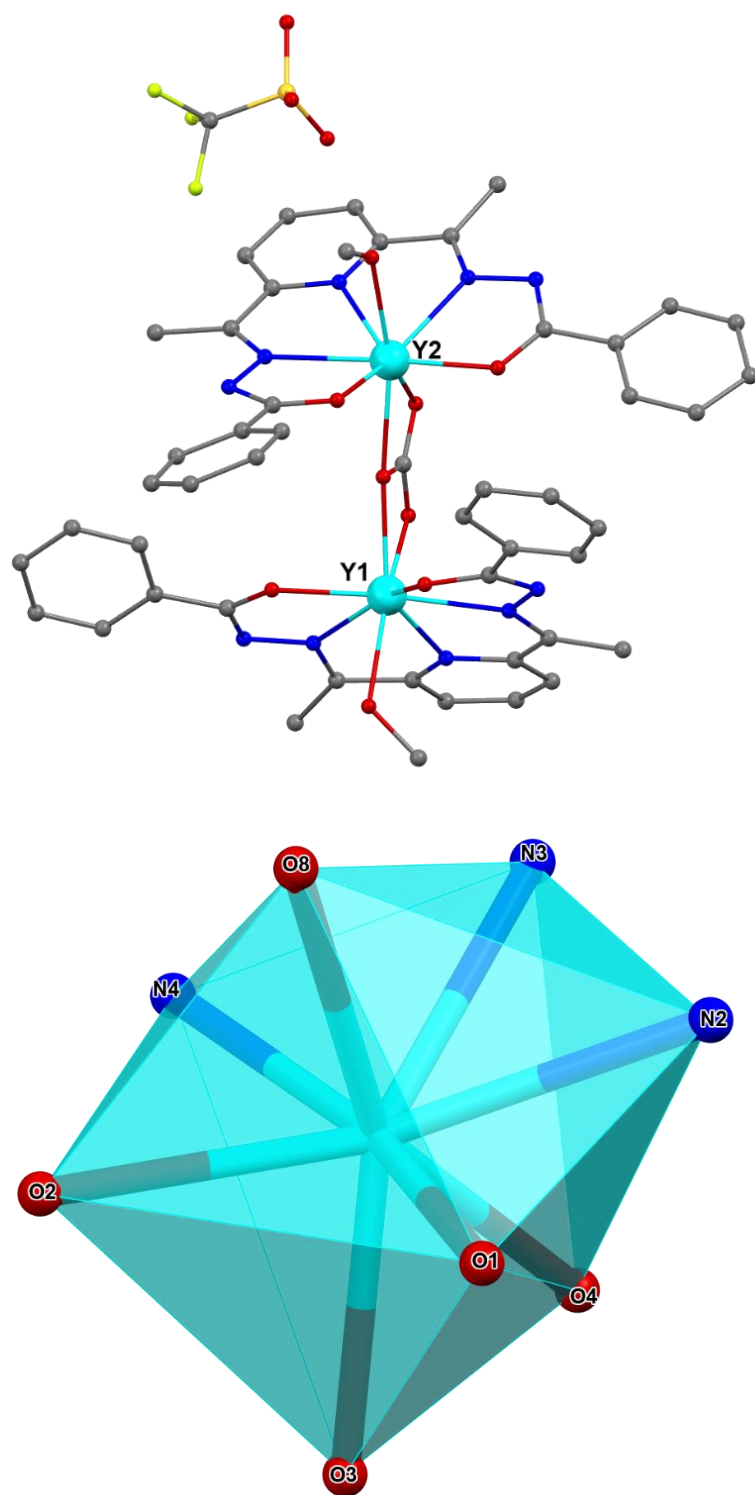

**Figure S15:** **Top:** The ball-and-stick models for the asymmetric unit of the single-crystal X-ray molecular structures of the  $1 \cdot Y \cdot H$ . Atoms and co-crystallised solvents in  $1 \cdot Y$  are omitted for clarity. Colour codes: cyan, Y; red, O; blue, N; grey, C; green, F; yellow, S. **Bottom:** The coordination polyhedron around the Y centre of  $1 \cdot Y$ .



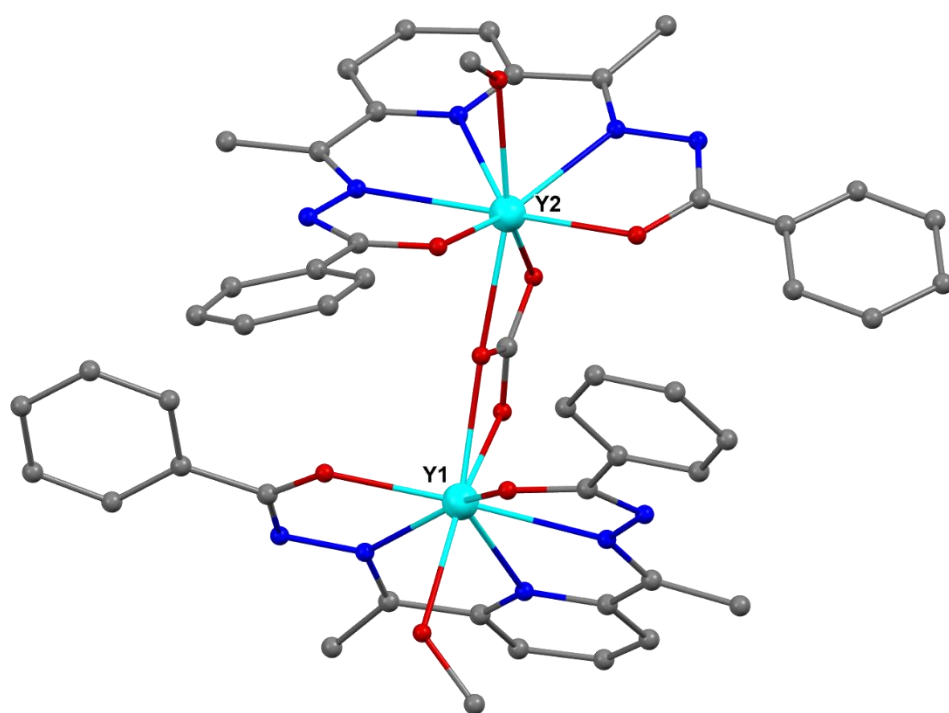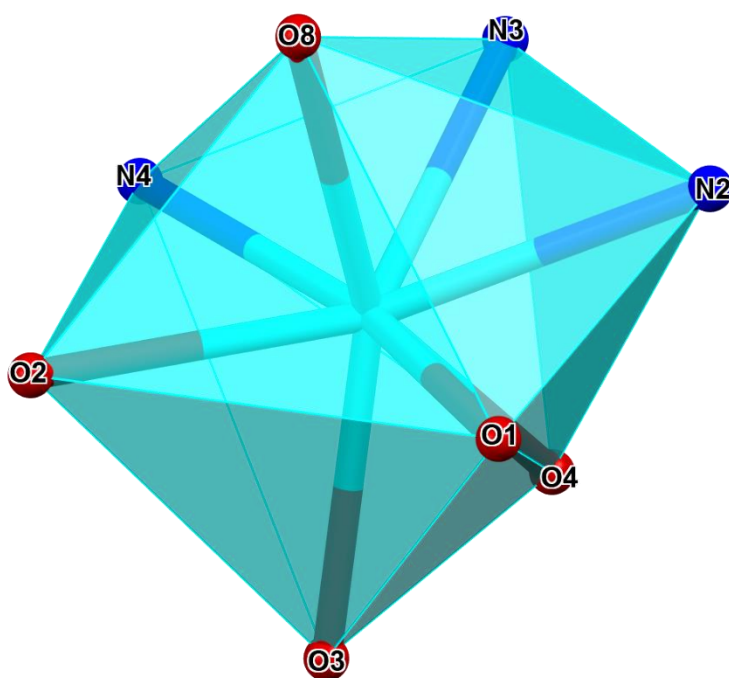

**Figure S16: Top:** The ball-and-stick models for the asymmetric unit of the single-crystal X-ray molecular structures of the  $2 \cdot Y \cdot H$ . Atoms and co-crystallised solvents in  $2 \cdot Y$  are omitted for clarity. Colour codes: cyan, Y; red, O; blue, N; grey, C. **Bottom:** The coordination polyhedron around the Y centre of  $2 \cdot Y$ .

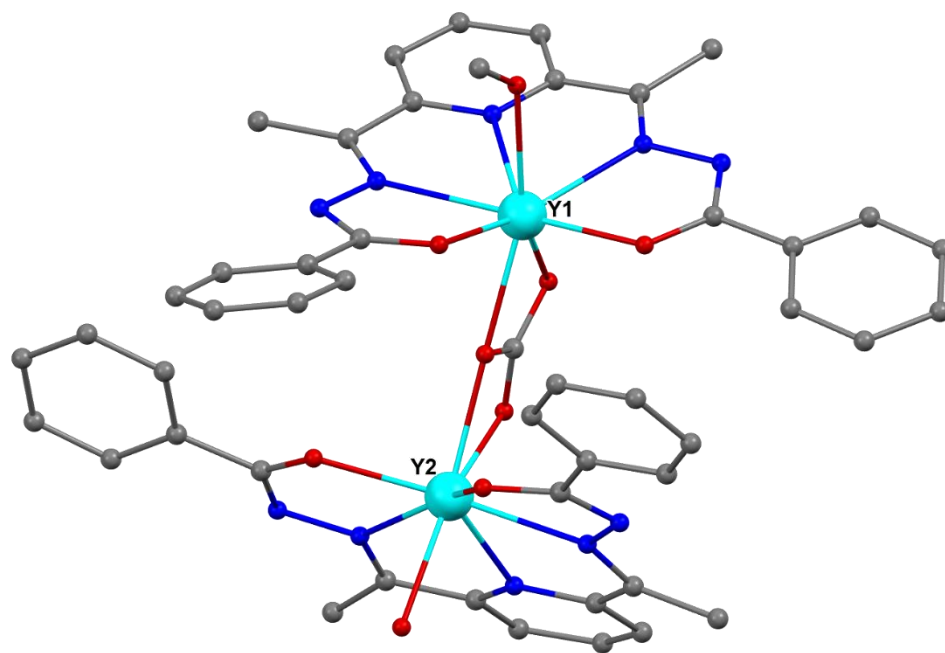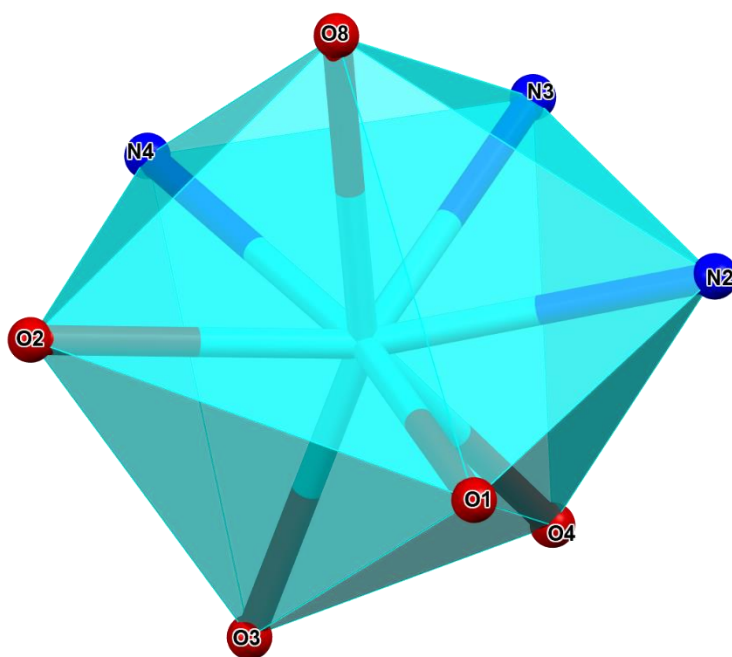

**Figure S17: Top:** The ball-and-stick models for the asymmetric unit of the single-crystal X-ray molecular structures of the  $3 \cdot Y$ . H atoms and co-crystallised solvents in  $3 \cdot Y$  are omitted for clarity. Colour codes: cyan, Y; red, O; blue, N; grey, C. **Bottom:** The coordination polyhedron around the Y centre of  $3 \cdot Y$ .

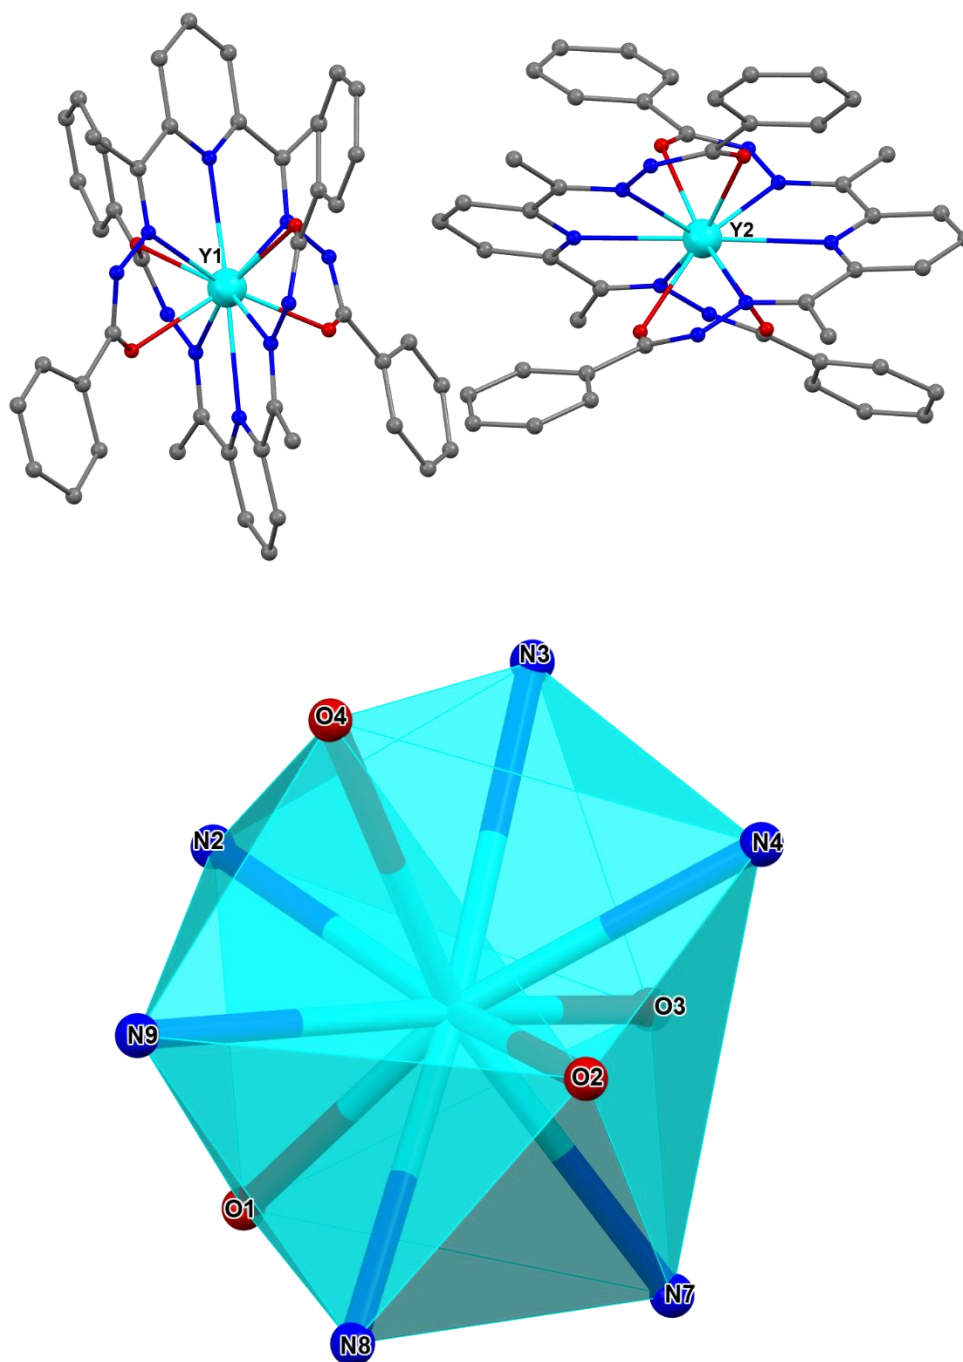

**Figure S18: Top:** The ball-and-stick models for the asymmetric unit of the single-crystal X-ray molecular structures of the  $4 \cdot Y \cdot H$ . H atoms and co-crystallised solvents in  $4 \cdot Y$  are omitted for clarity. Colour codes: cyan, Y; red, O; blue, N; grey, C. **Bottom:** The coordination polyhedron around the Y centre of  $4 \cdot Y$

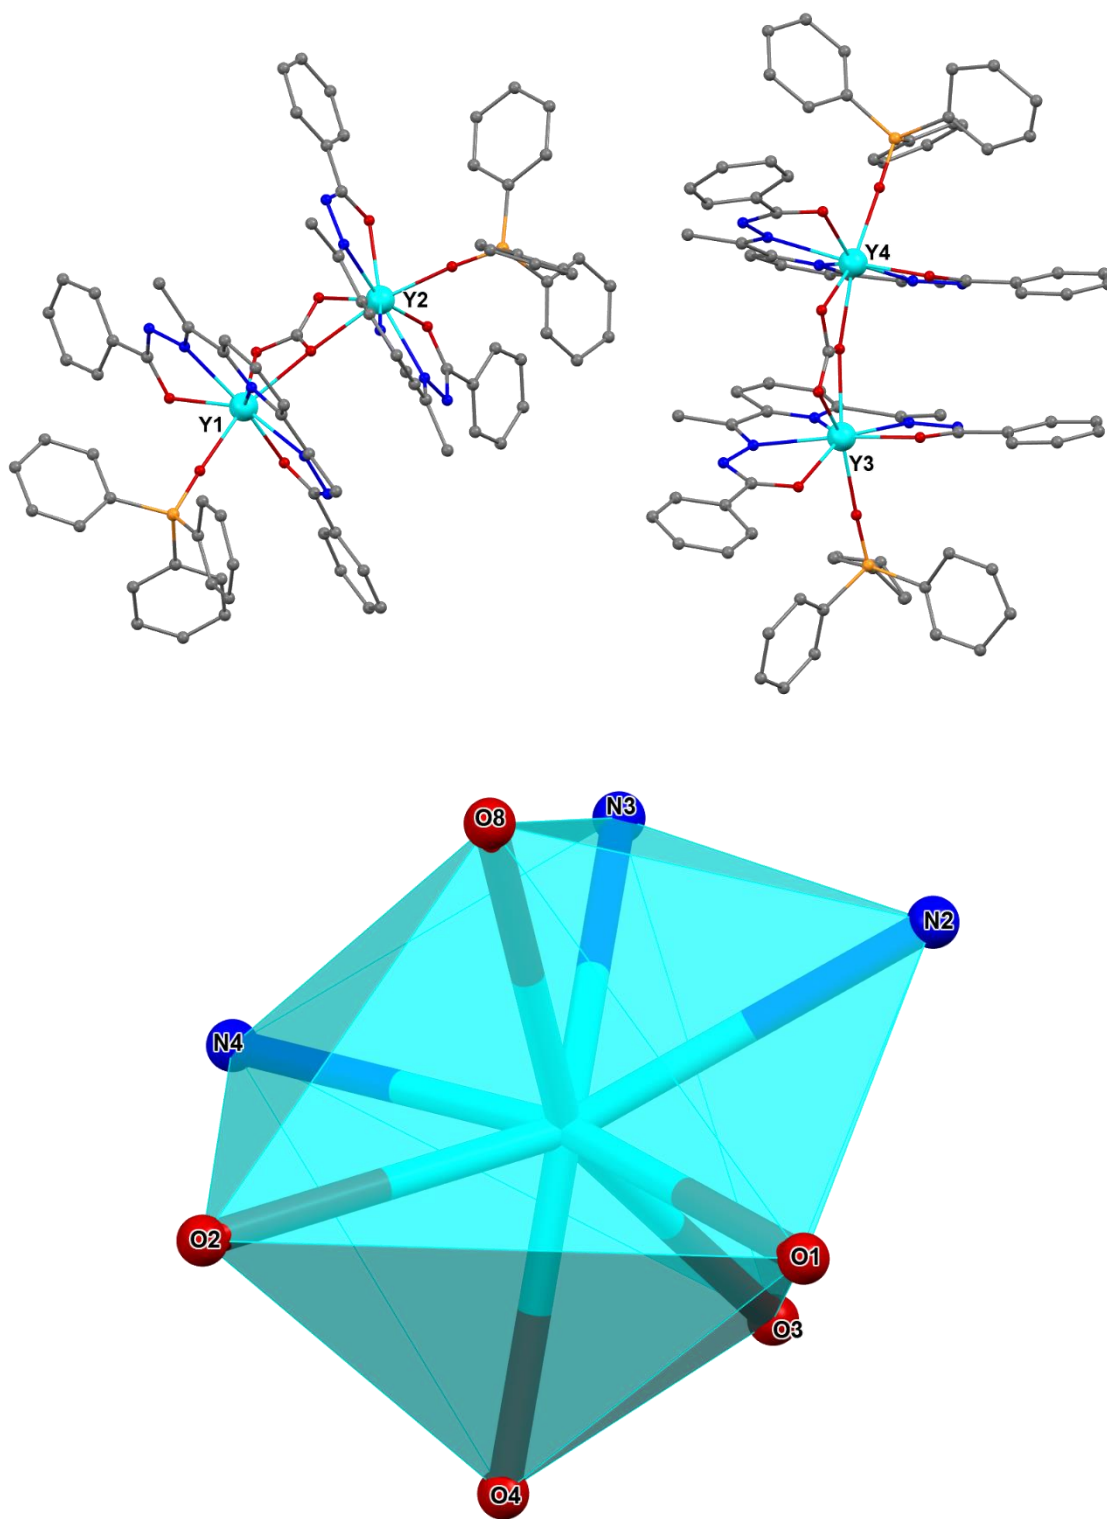

**Figure S19: Top:** The ball-and-stick models for the asymmetric unit of the single-crystal X-ray molecular structures of the  $6 \cdot Y \cdot H$  atoms and co-crystallised solvents in  $6 \cdot Y$  are omitted for clarity. Colour codes: cyan, Y; red, O; blue, N; grey, C; orange, P. **Bottom:** The coordination polyhedron around the Y centre of  $6 \cdot Y$

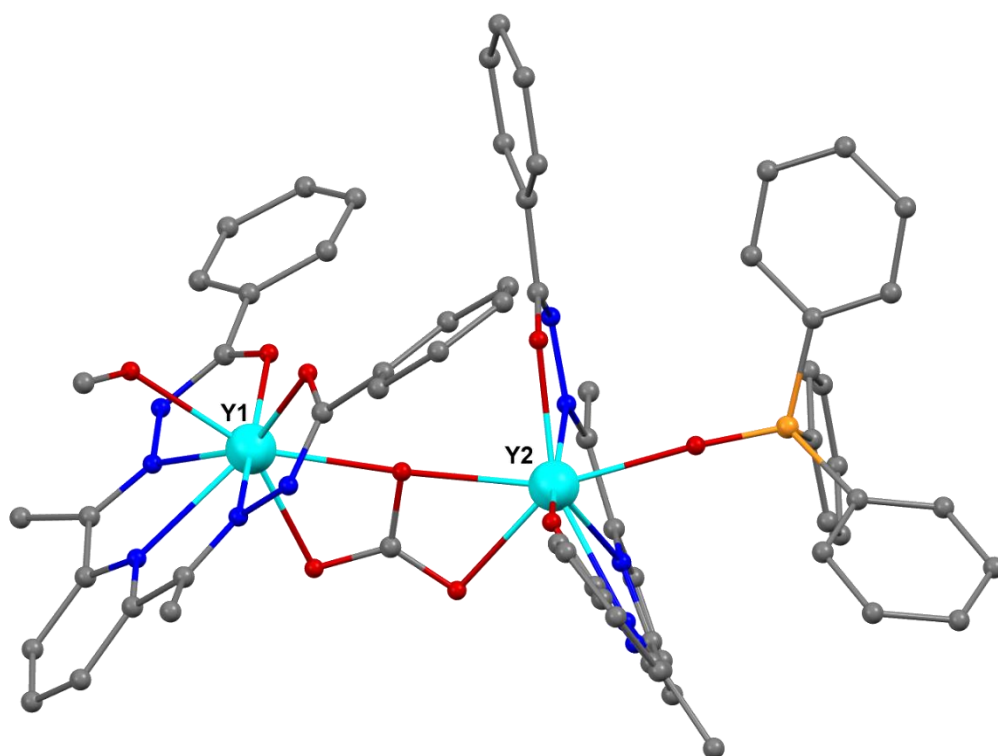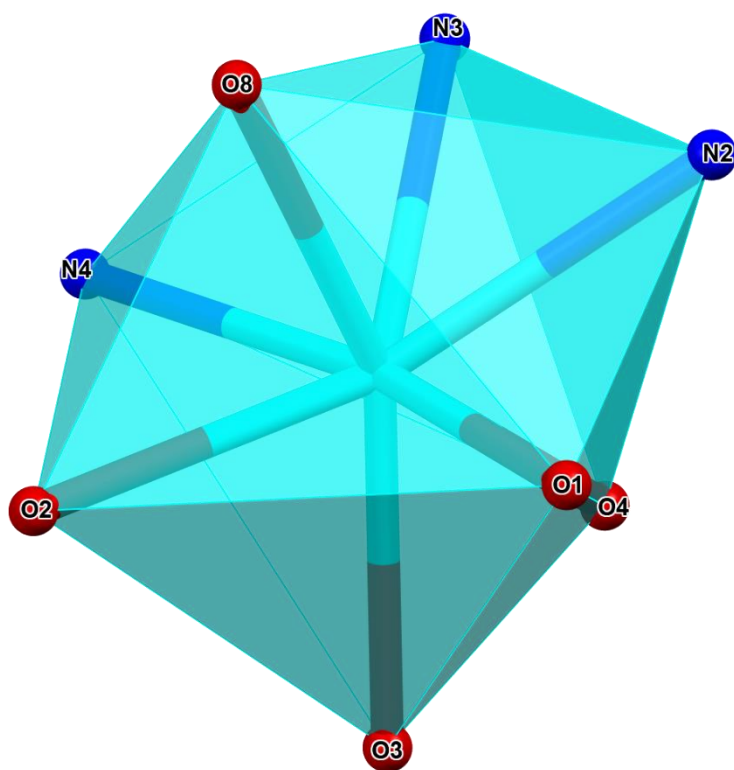

**Figure S20: Top:** The ball-and-stick models for the asymmetric unit of the single-crystal X-ray molecular structures of the  $5 \cdot Y$ . H atoms and co-crystallised solvents in  $5 \cdot Y$  are omitted for clarity. Colour codes: cyan, Y; red, O; blue, N; grey, C; orange, P. **Bottom:** The coordination polyhedron around the Y centre of  $5 \cdot Y$

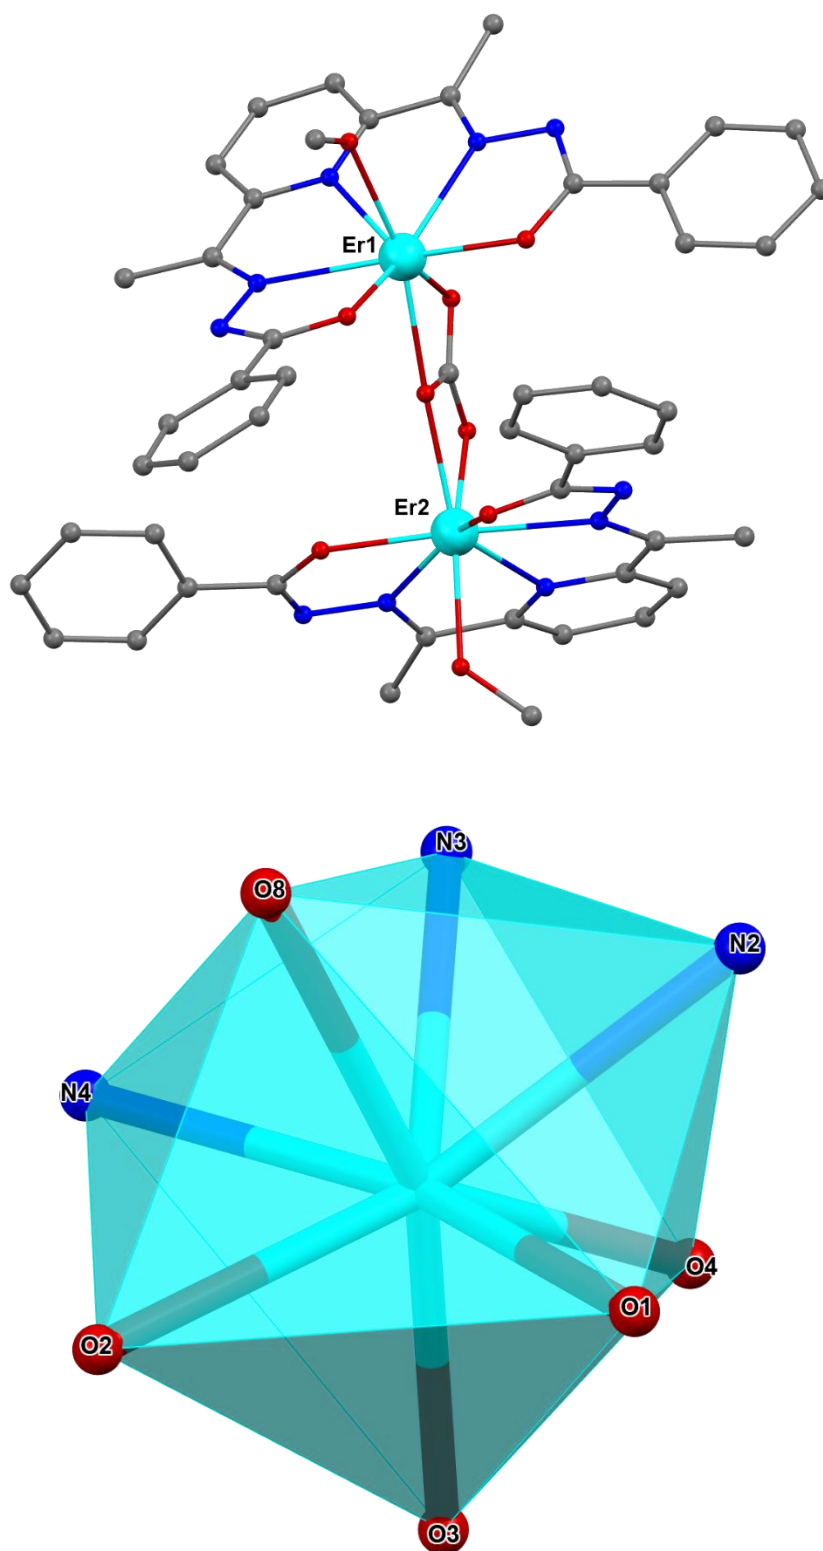

**Figure S21: Top:** The ball-and-stick models for the asymmetric unit of the single-crystal X-ray molecular structures of the  $2 \cdot \text{Er} \cdot \text{H}$ . H atoms and co-crystallised solvents in  $2 \cdot \text{Er}$  are omitted for clarity. Colour codes: cyan, Y; red, O; blue, N; grey, C. **Bottom:** The coordination polyhedron around the Y centre of  $2 \cdot \text{Er}$

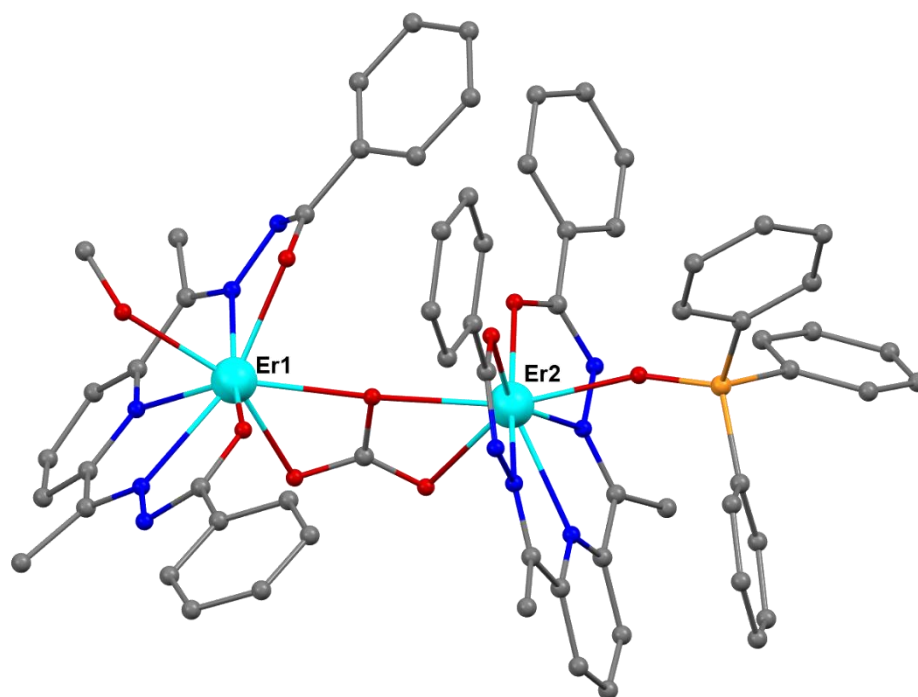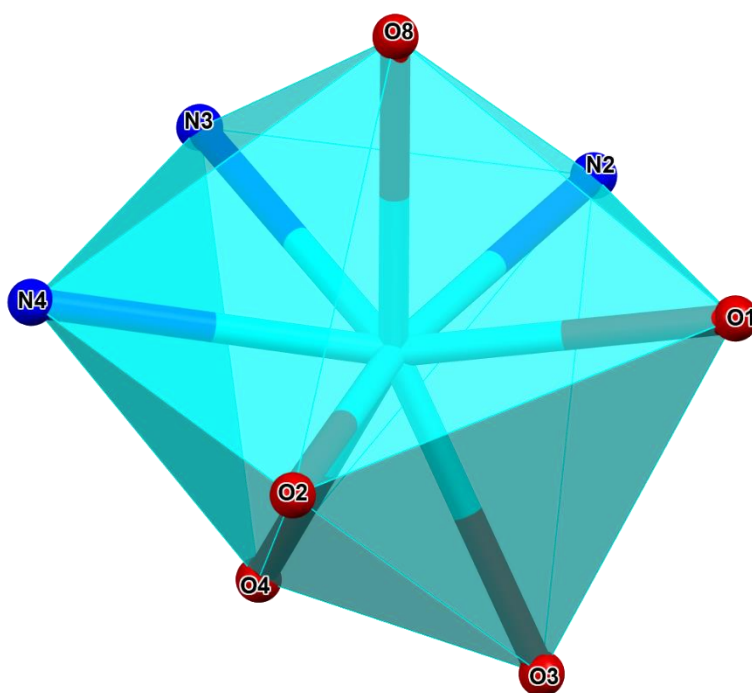

**Figure S22: Top:** The ball-and-stick models for the asymmetric unit of the single-crystal X-ray molecular structures of the  $5 \cdot \text{Er} \cdot \text{H}$  atoms and co-crystallised solvents in  $5 \cdot \text{Er}$  are omitted for clarity. Colour codes: cyan, Y; red, O; blue, N; grey, C; orange, P. **Bottom:** The coordination polyhedron around the Y centre of  $5 \cdot \text{Er}$

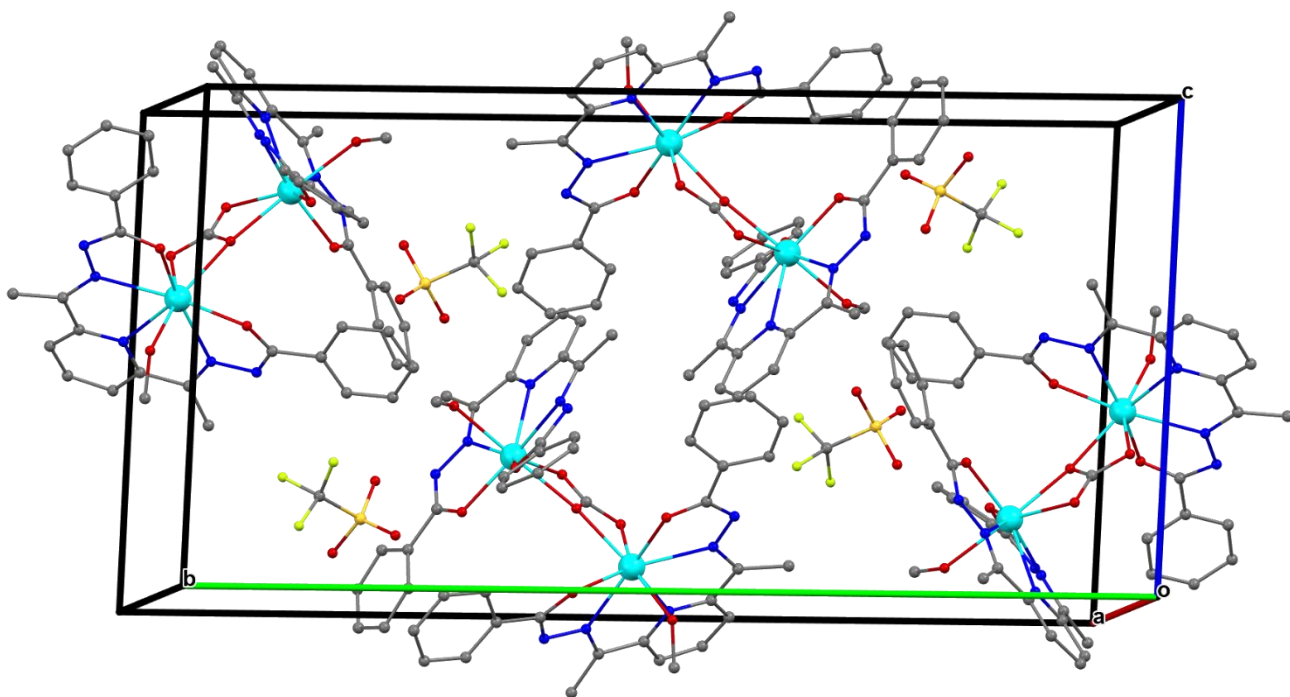

**Figure S23:** Unit cell contents of  $1 \cdot Y$ . Colour codes: cyan, Y; red, O; blue, N; grey, C; green F; yellow, S.

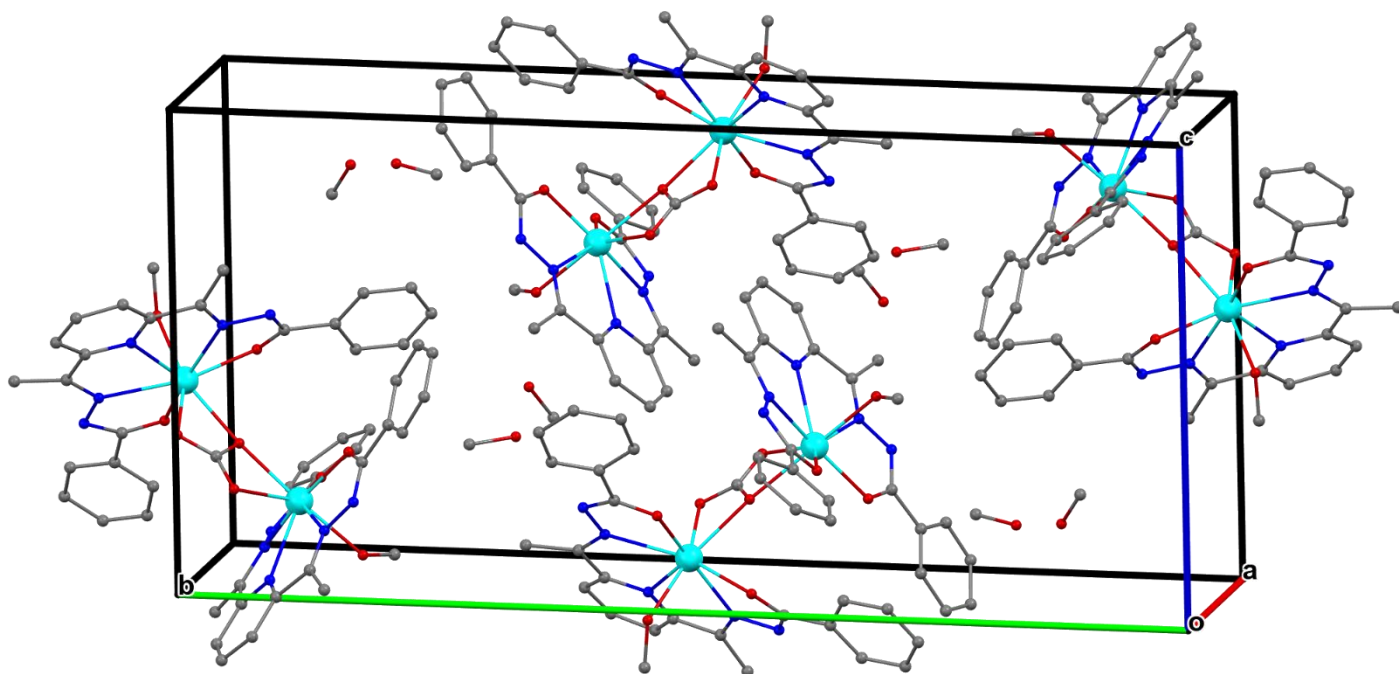

**Figure S24:** Unit cell contents of  $2 \cdot Y$ . Colour codes: cyan, Y; red, O; blue, N; grey, C.



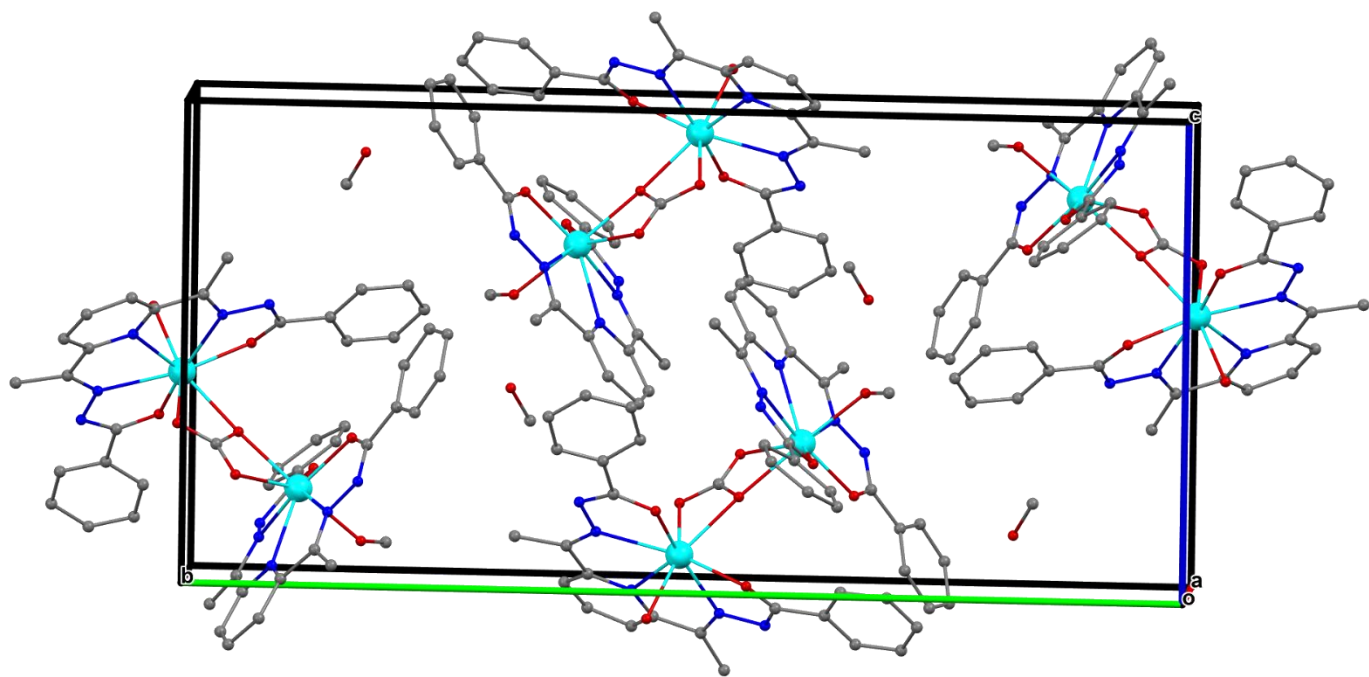

**Figure S25:** Unit cell contents of  $3 \cdot Y$ . Colour codes: cyan, Y; red, O; blue, N; grey, C.

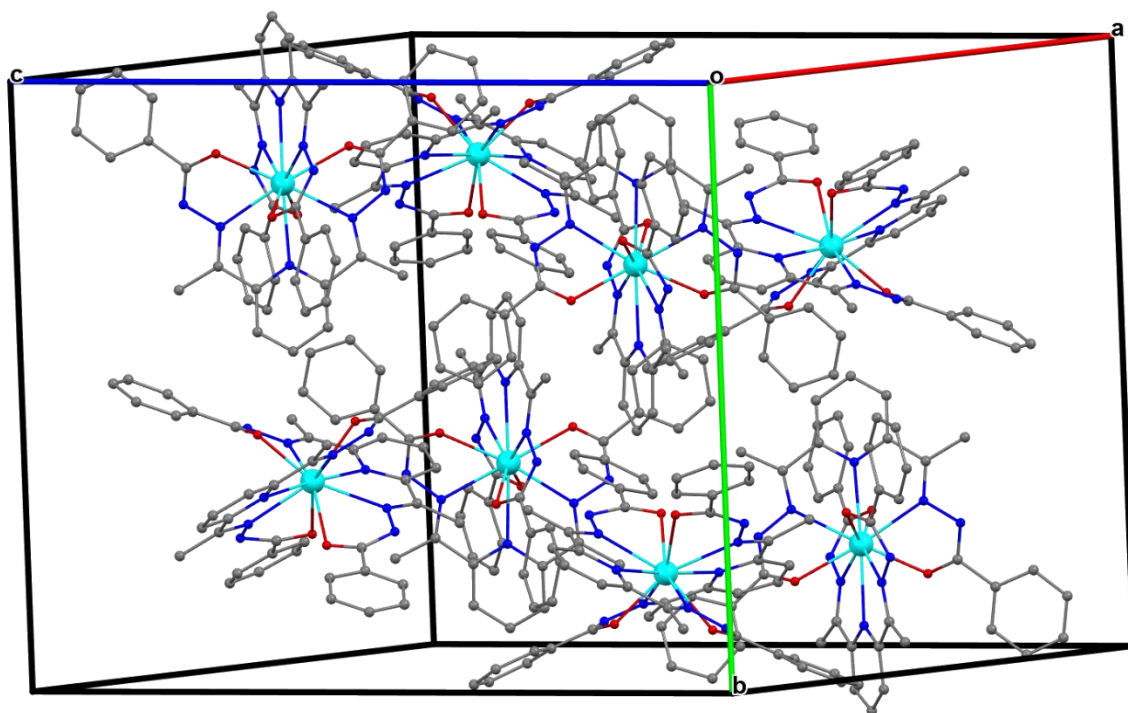

**Figure S26:** Unit cell contents of  $4 \cdot Y$ . Colour codes: cyan, Y; red, O; blue, N; grey, C.

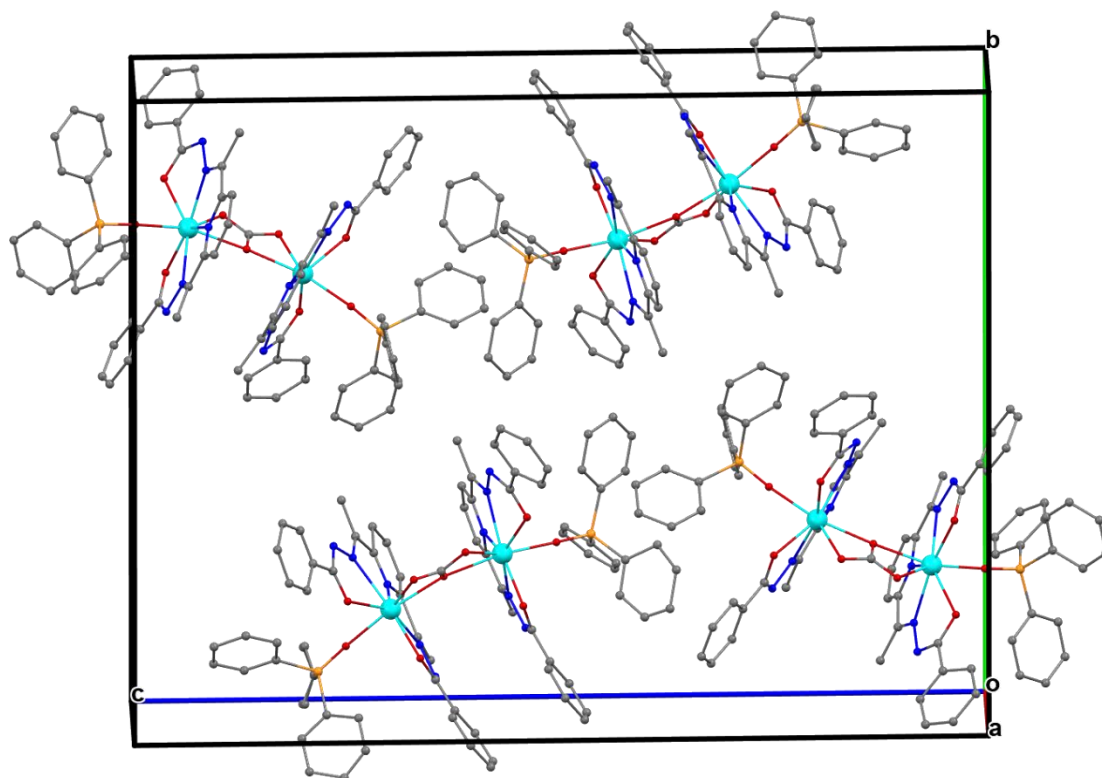

**Figure S27:** Unit cell contents of  $6 \cdot Y$ . Colour codes: cyan, Y; red, O; blue, N; grey, C; orange, P

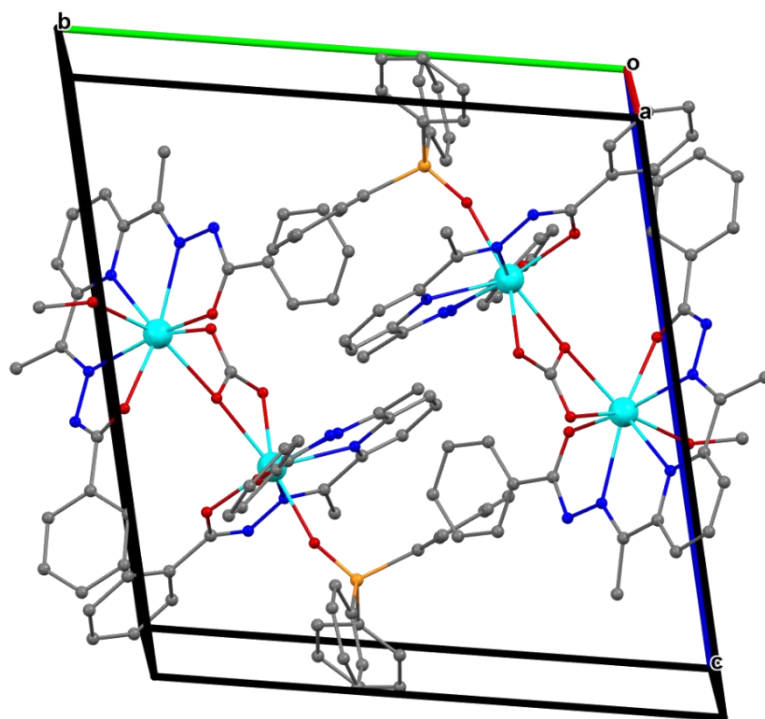

**Figure S28:** Unit cell contents of  $5 \cdot Y$ . Colour codes: cyan, Y; red, O; blue, N; grey, C; orange, P

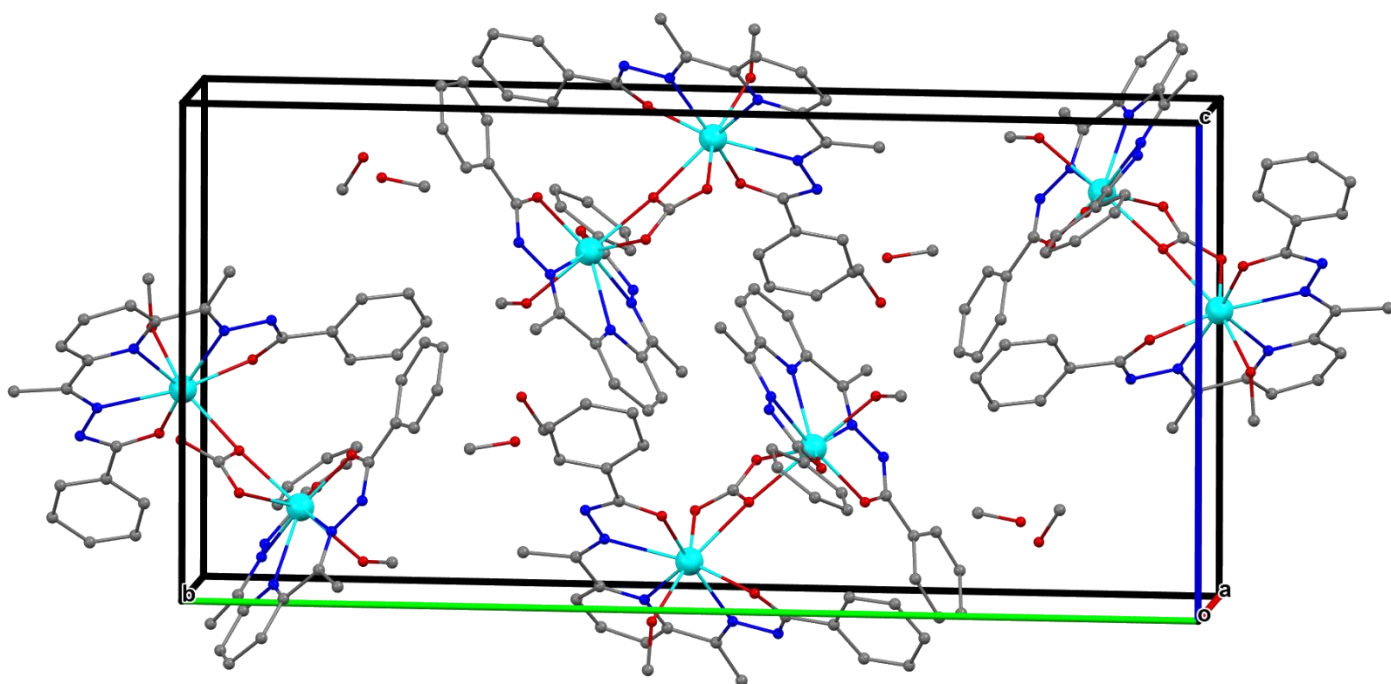

**Figure S29:** Unit cell contents of  $2 \cdot \text{Er}$ . Colour codes: cyan, Er; red, O; blue, N; grey, C

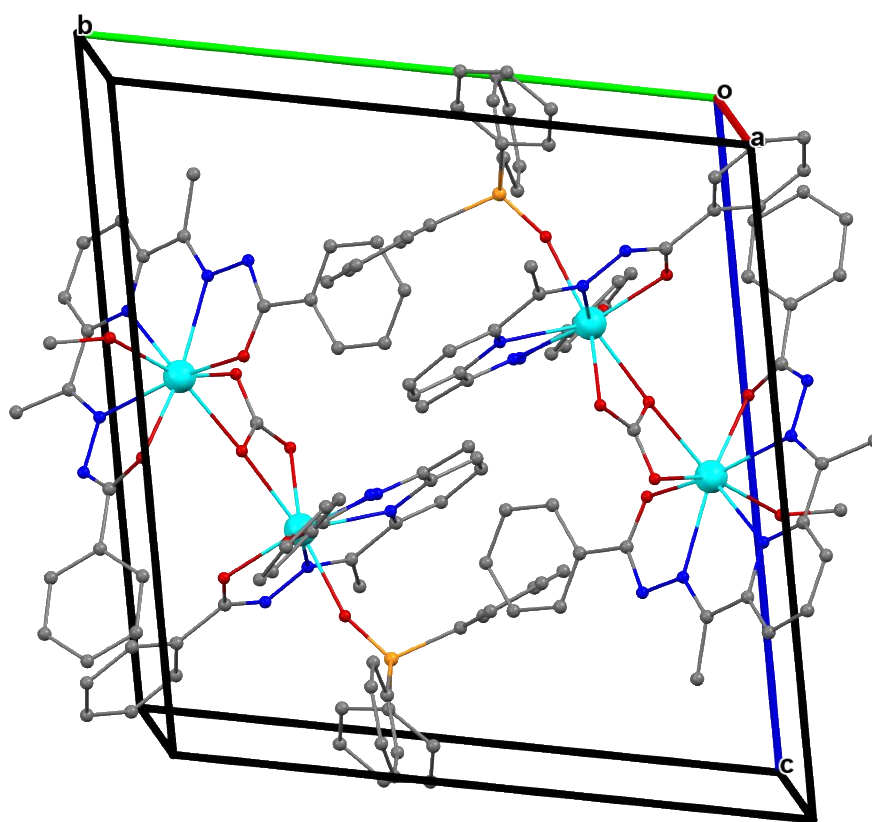

**Figure S30:** Unit cell contents of  $5 \cdot \text{Er}$ . Colour codes: cyan, Er; red, O; blue, N; grey, C; orange, P

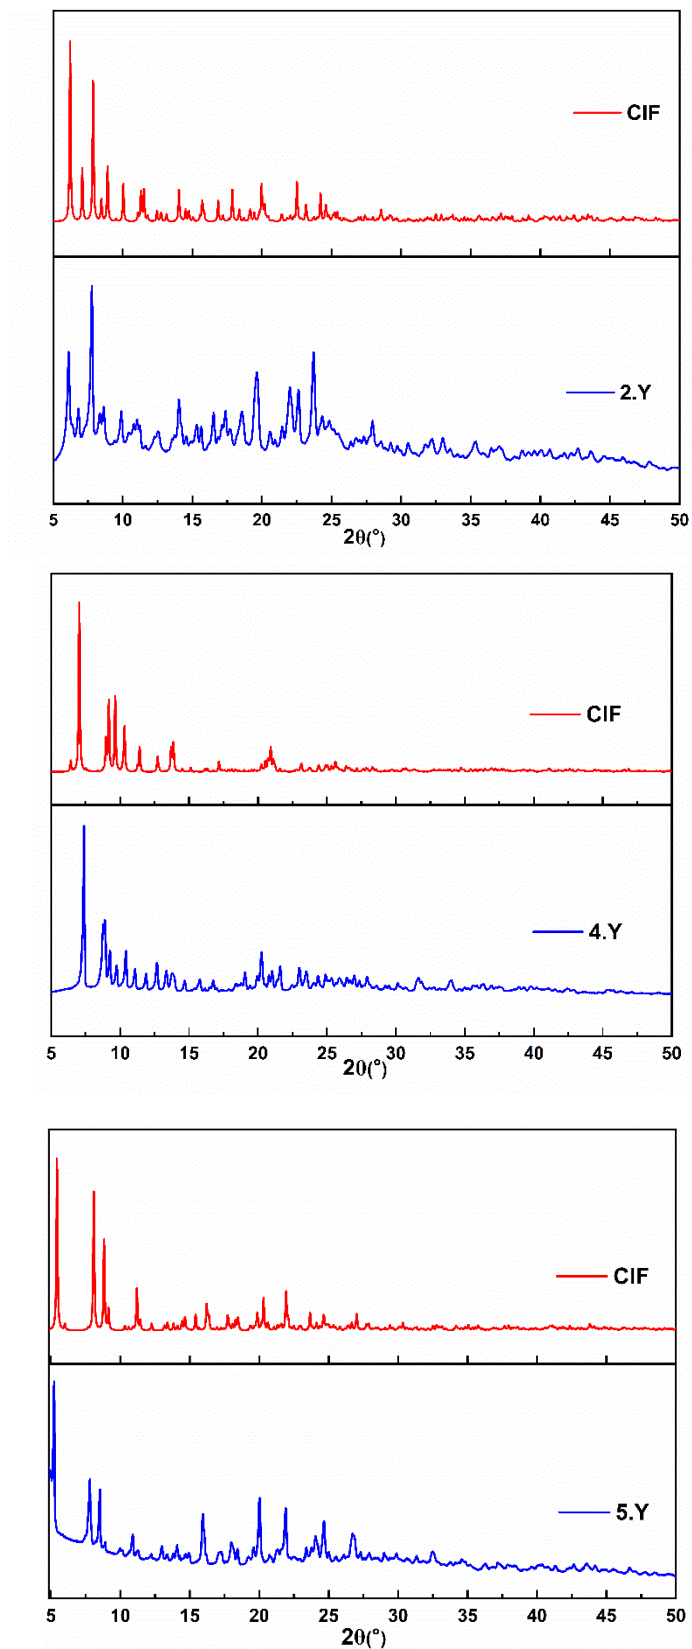

**Figure S31:** The powder X-ray diffraction patterns of the complexes **2·Y** (*top*), **4·Y** (*middle*), and **5·Y** (*bottom*) recorded at room temperature. Colour codes: experimental, blue; and simulated, red.

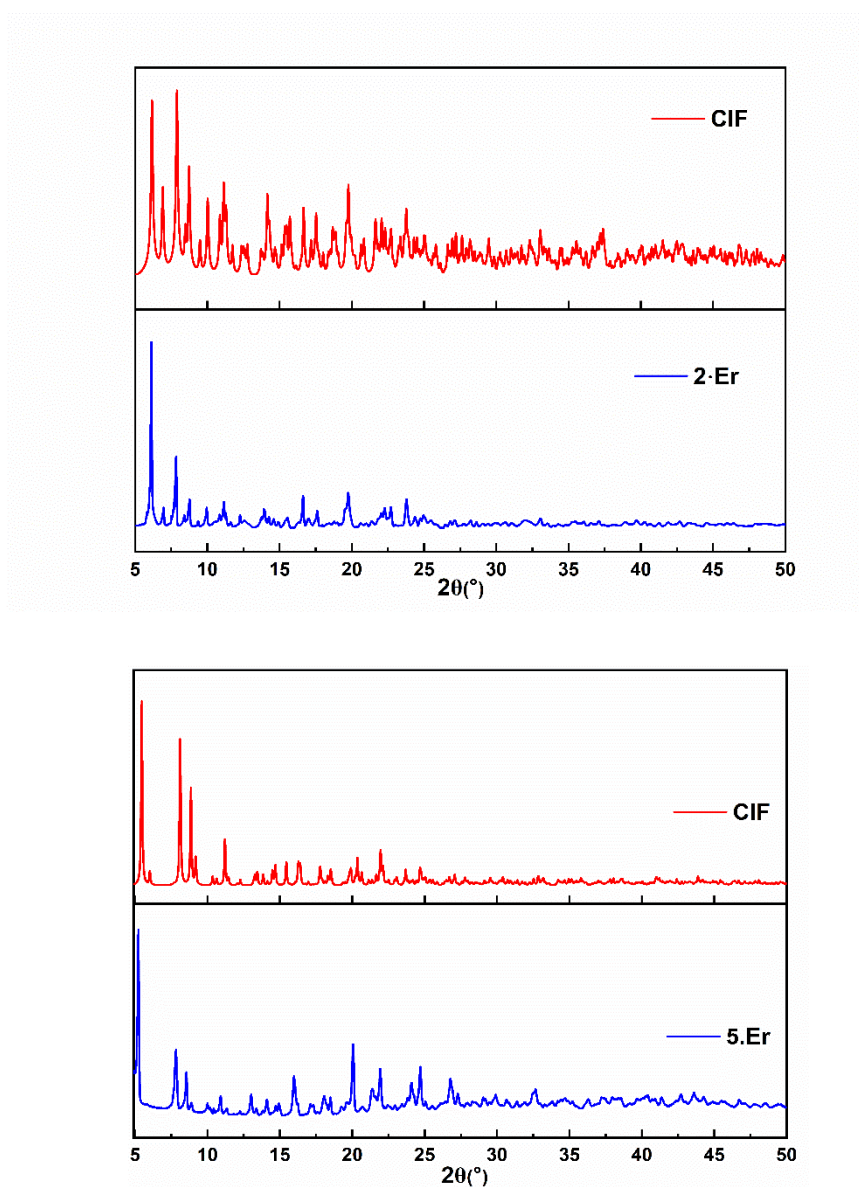

**Figure S32:** The powder X-ray diffraction patterns of the complexes **2·Er** (*top*), and **5·Er** (*bottom*) recorded at room temperature. Colour codes: experimental, blue; and simulated, red.

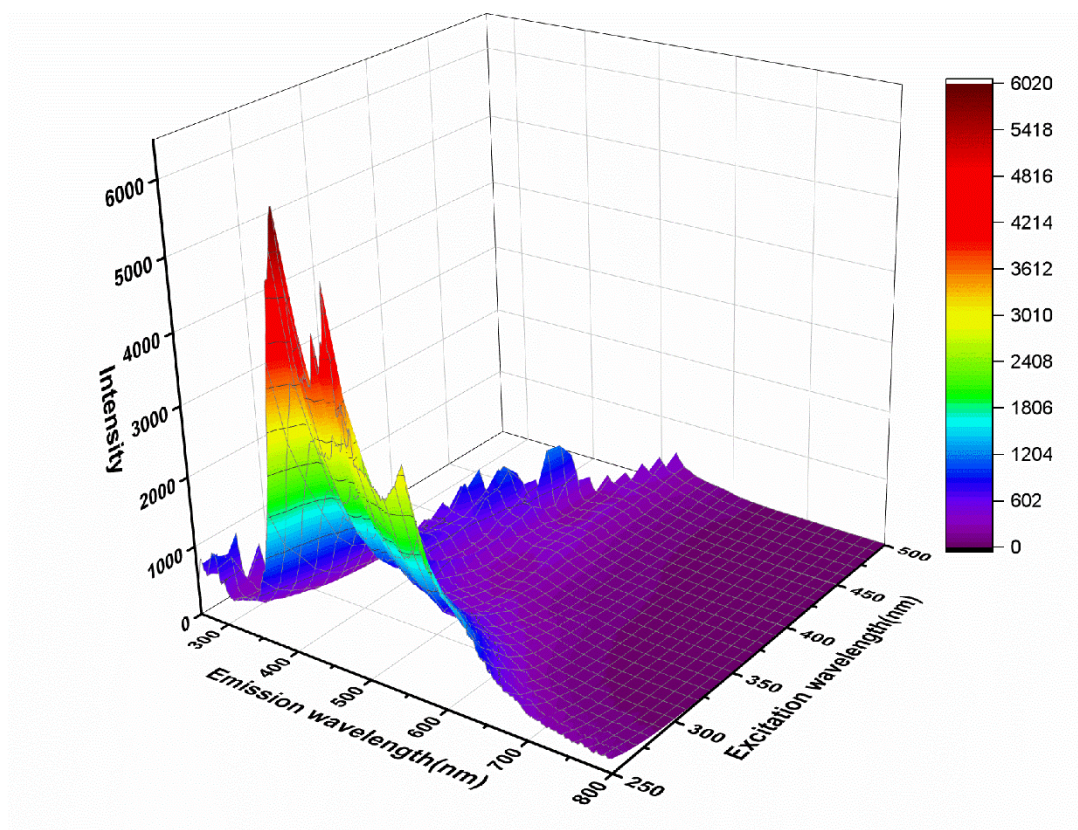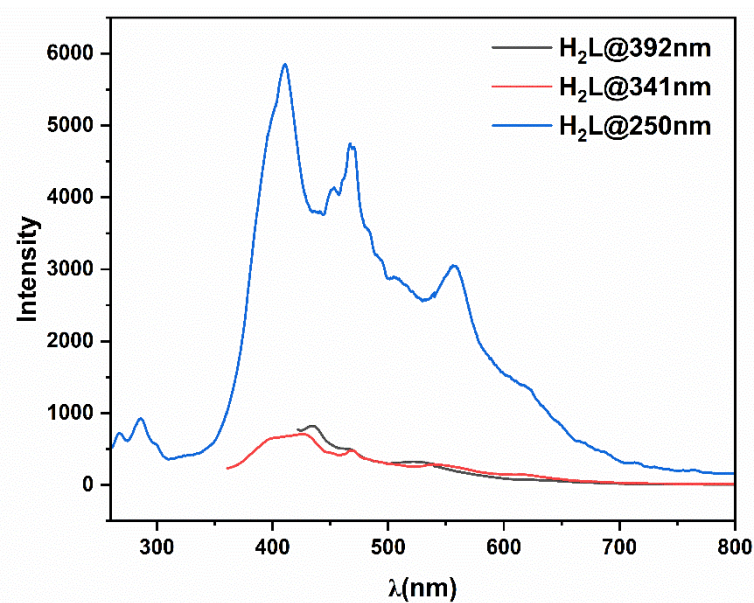

**Figure S33:** The room temperature photoluminescence excitation spectra of **H<sub>2</sub>L** in solid state(top) and emission spectra at mentioned excitation wavelengths(bottom). The spectral characteristics are provided in the main text, and the measurement details are described in the experimental section.

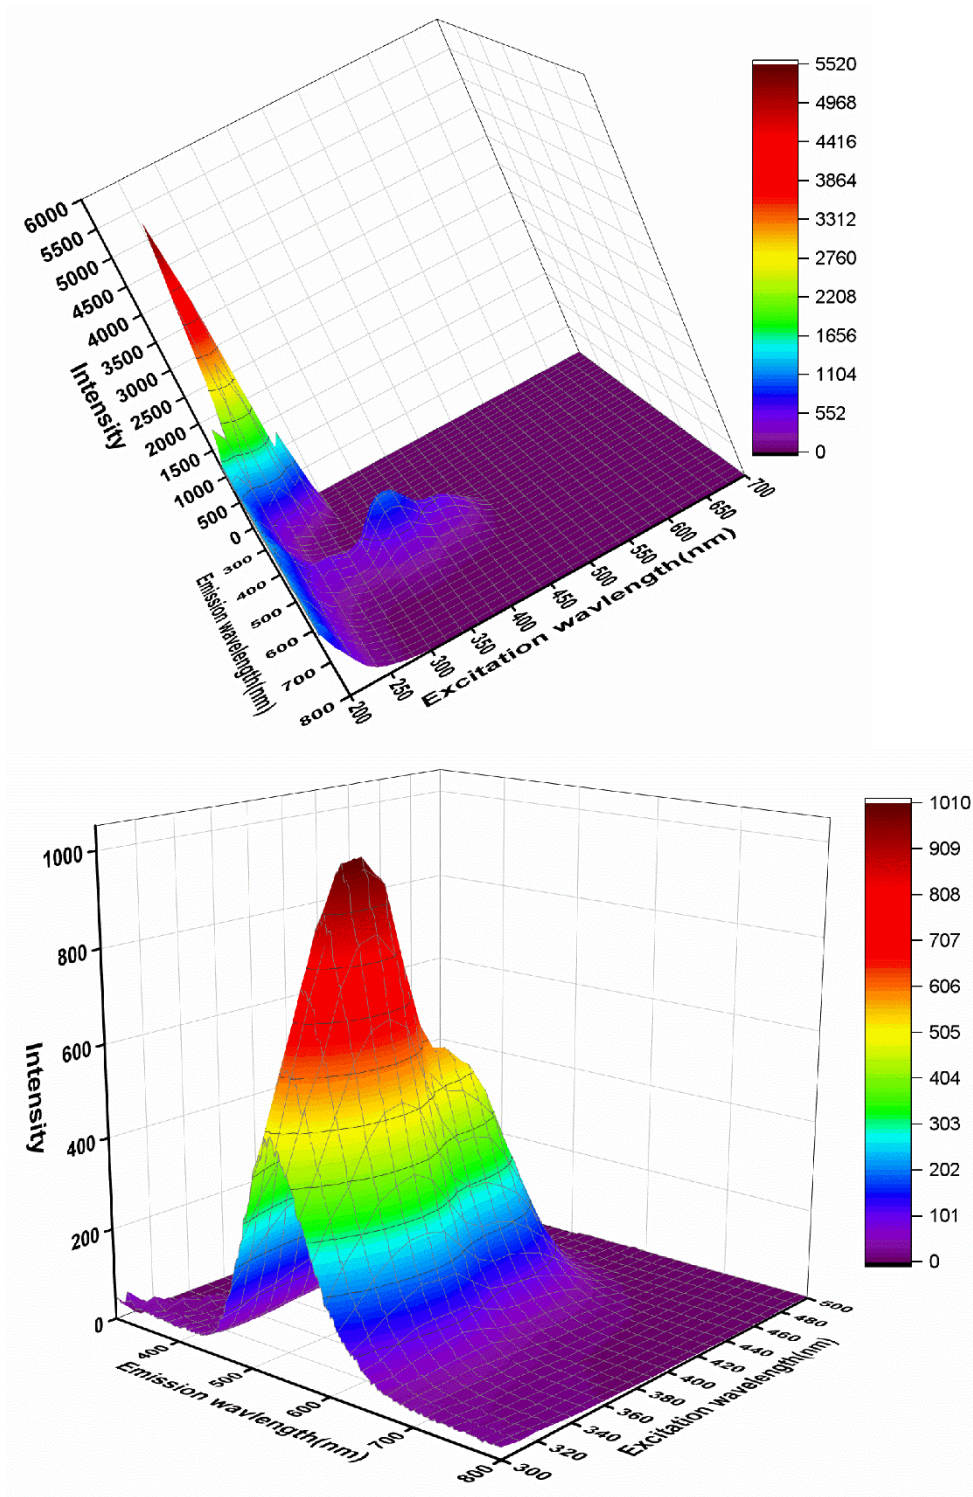

**Figure S34:** The room temperature photoluminescence excitation spectra of methanolic solutions ( $10\mu\text{M}$ ) of  $2\cdot\text{Y}$  from 200-700nm(top) and 300-500nm(down). The spectral characteristics are provided in the main text, and the measurement details are described in the experimental section.

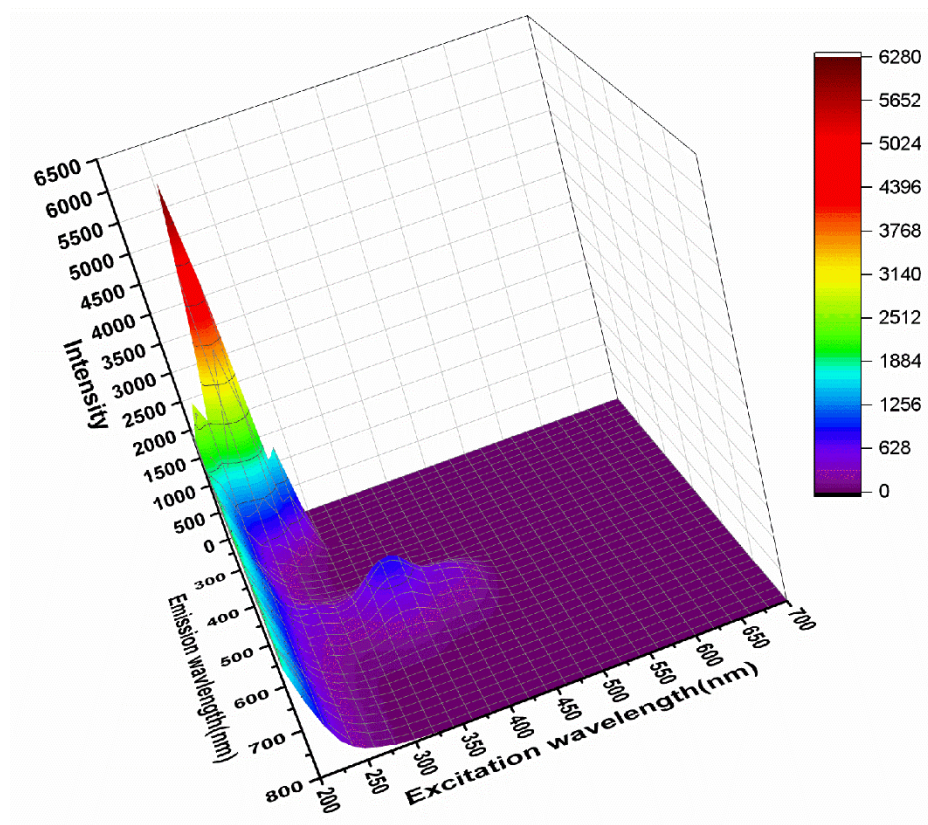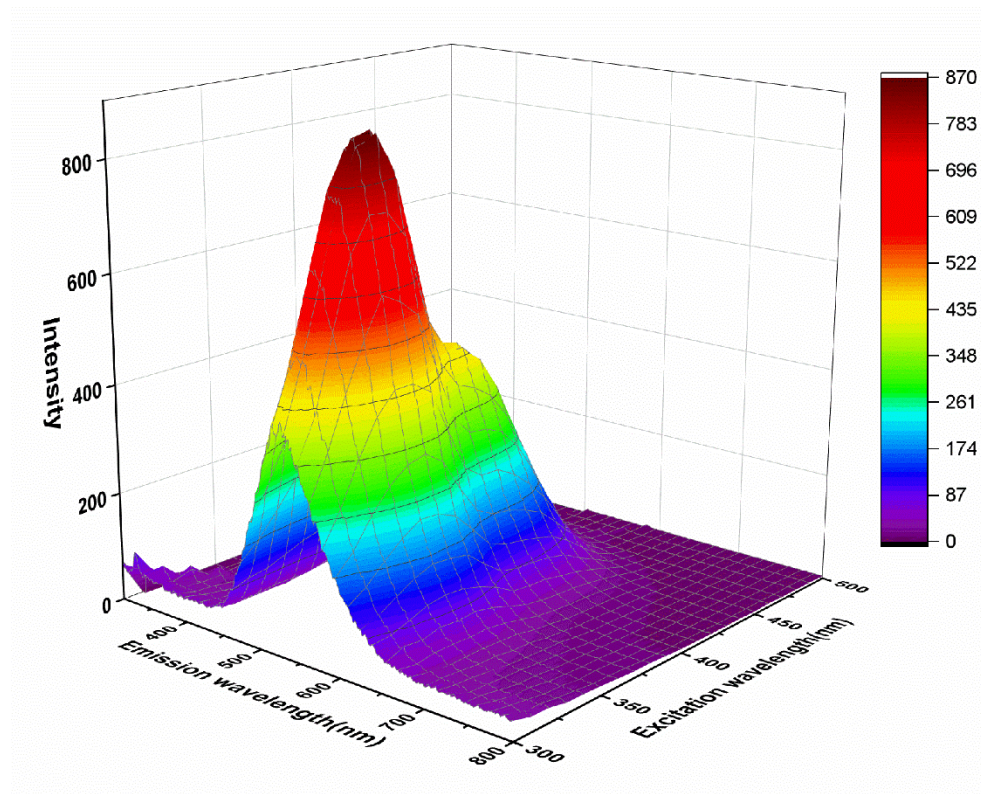

**Figure S35:** The room temperature photoluminescence excitation spectra of methanolic solutions ( $10\mu\text{M}$ ) of  $5\cdot\text{Y}$  from 200-700nm(top) and 300-500nm(down). The spectral characteristics are provided in the main text, and the measurement details are described in the experimental section



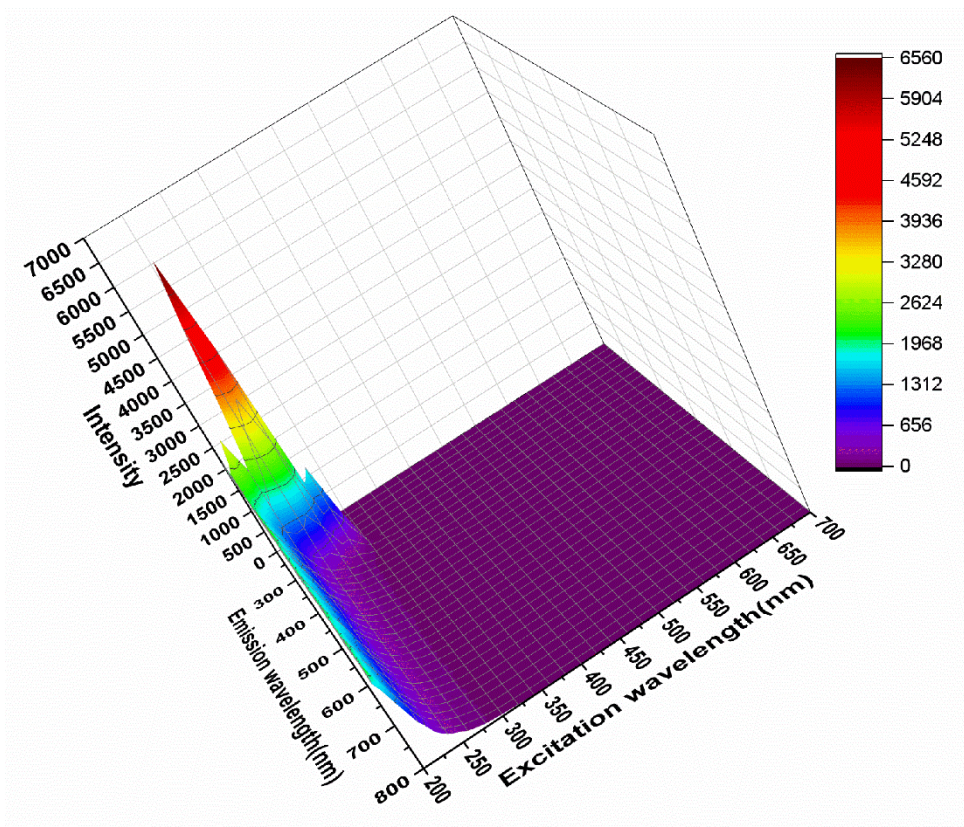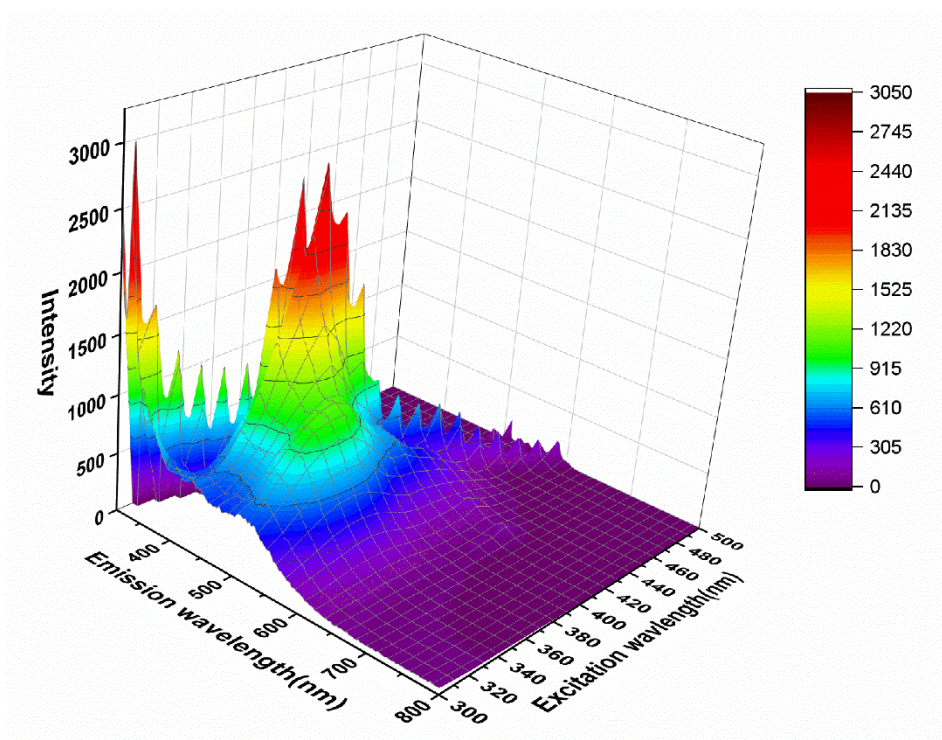

**Figure S36:** The room temperature photoluminescence excitation spectra of methanolic solutions ( $10\mu\text{M}$ ) of  $2\cdot\text{Er}$  from 200-700nm(top) and 300-500nm(down). The spectral characteristics are provided in the main text, and the measurement details are described in the experimental section

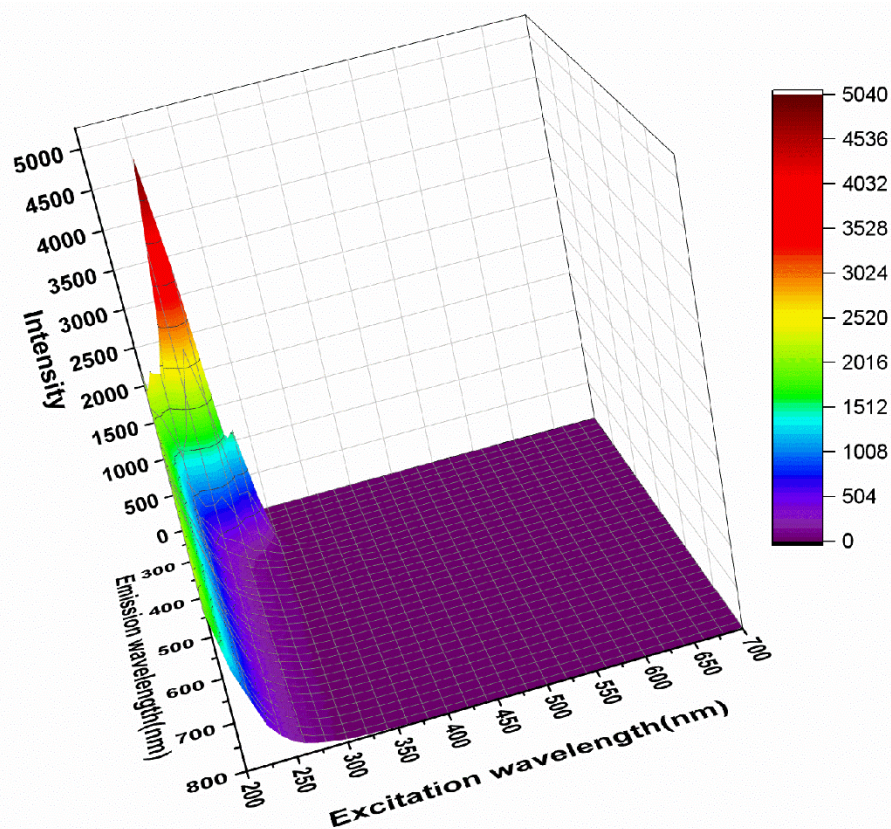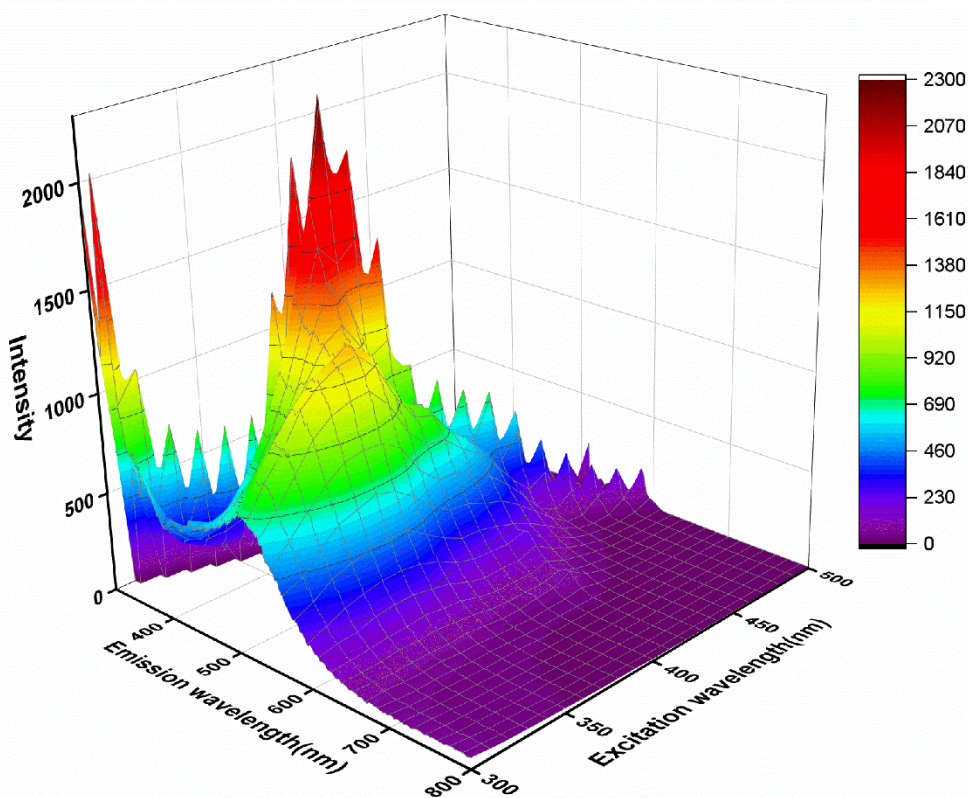

**Figure S37:** The room temperature photoluminescence excitation spectra of methanolic solutions ( $10\mu\text{M}$ ) of **5-Er** from 200-700nm(top) and 300-500nm(down). The spectral characteristics are provided in the main text, and the measurement details are described in the experimental section

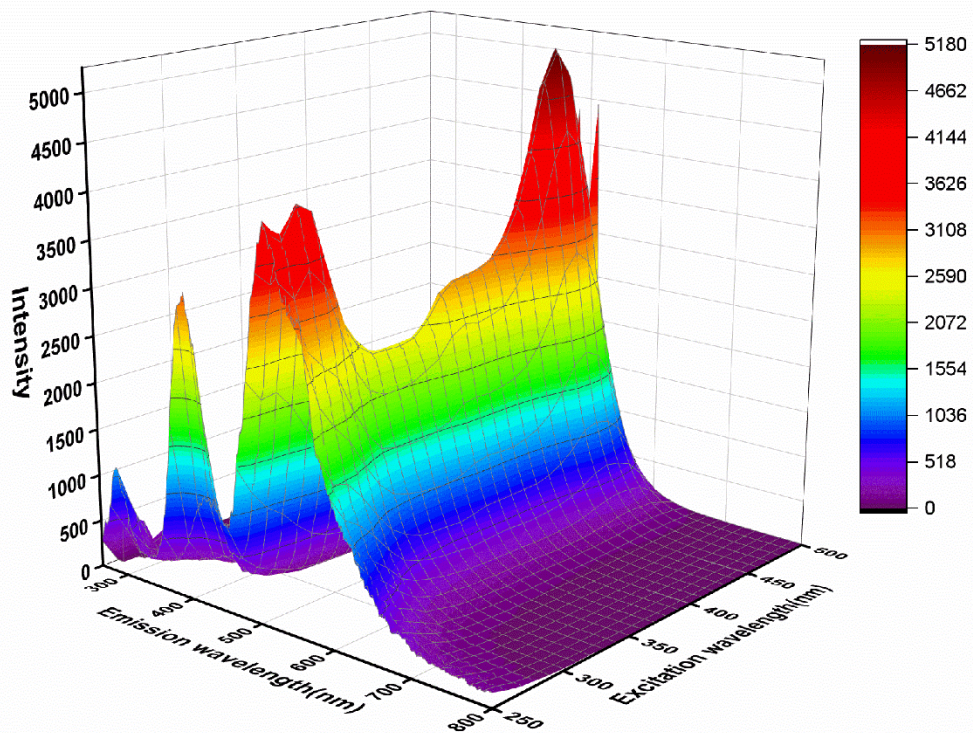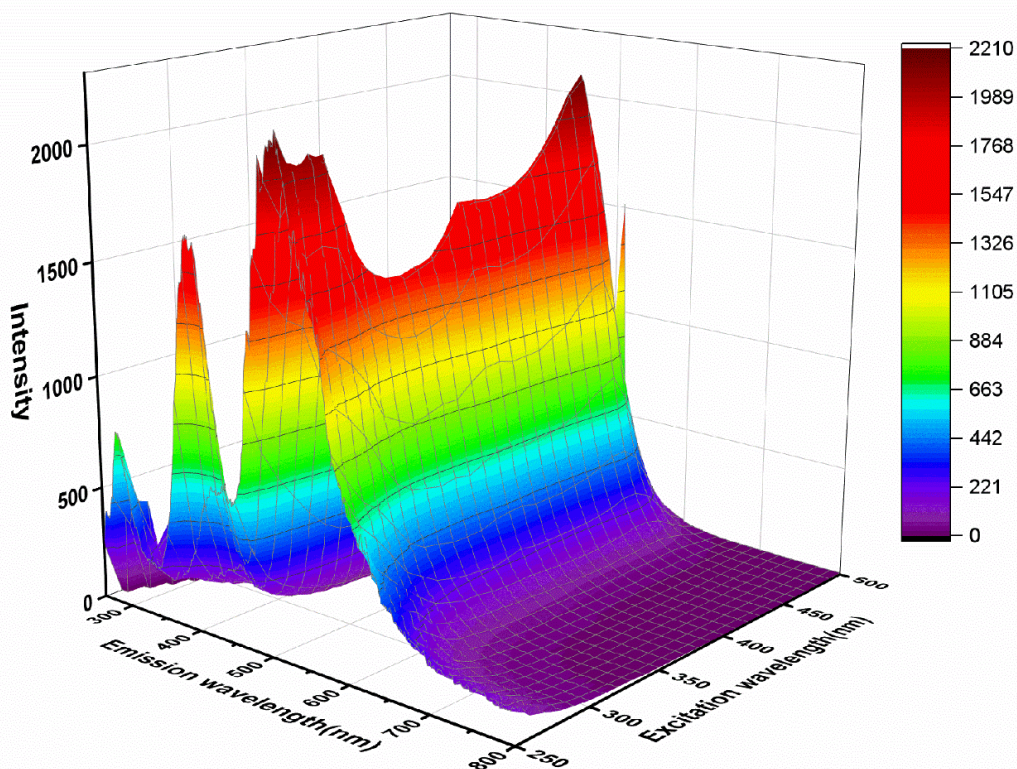

**Figure S38:** The room temperature photoluminescence excitation spectra of the solid samples **2·Y**(top) and **5·Y**(bottom) from 250 -500 nm. The spectral characteristics are provided in the main text, and the measurement details are described in the experimental section.

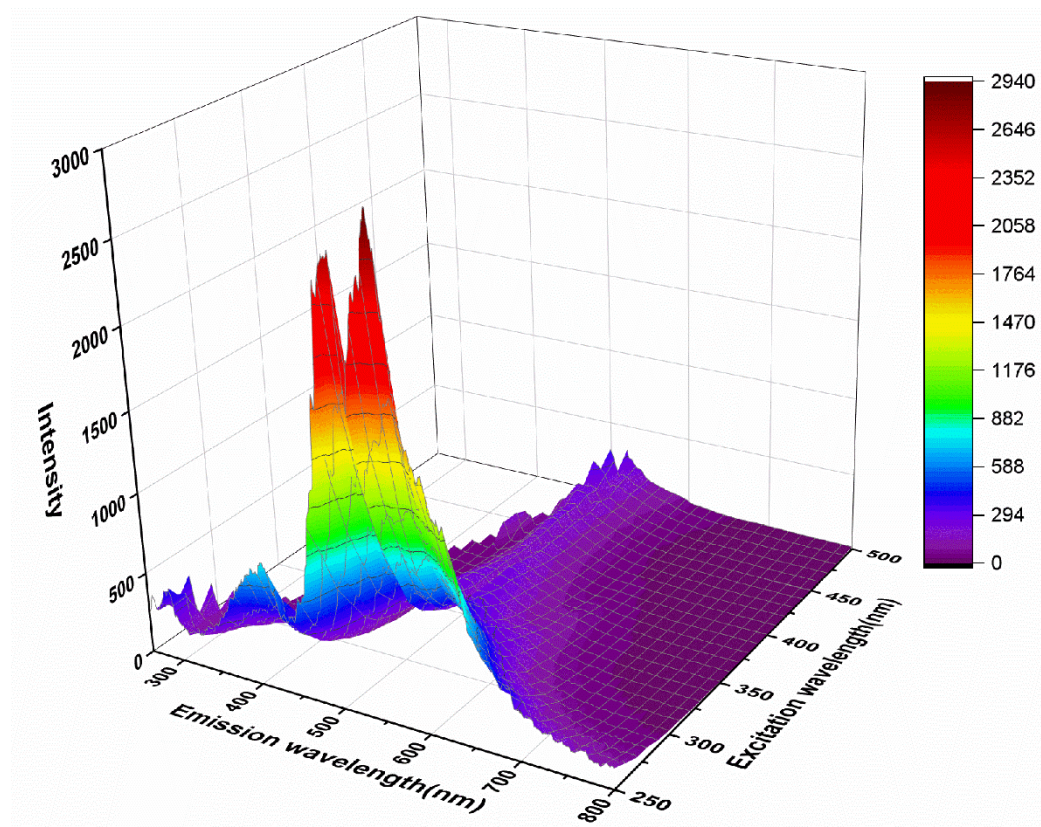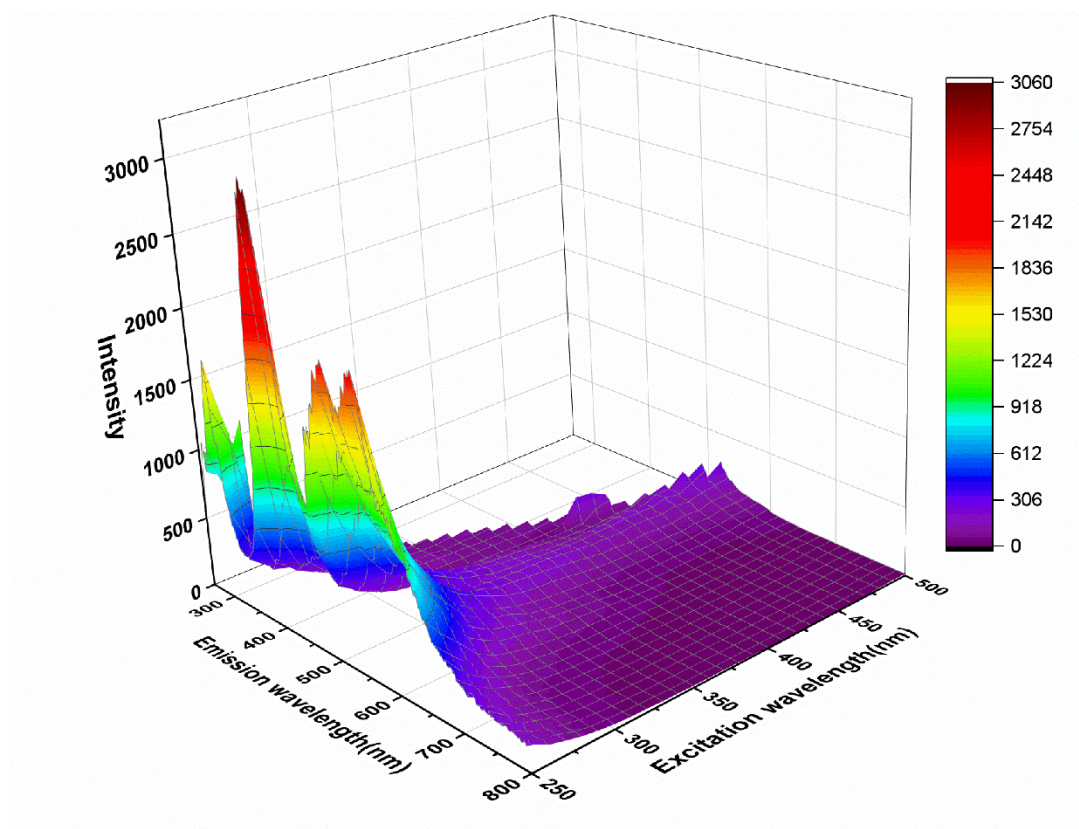

**Figure S39:** The room temperature photoluminescence excitation spectra of the solid samples **2·Er(top)** and **5·Er(bottom)** from 250 -500 nm. The spectral characteristics are provided in the main text, and the measurement details are described in the experimental section.

**Table S5:** Selected crystallographic data and refinement parameters for **1·Y**, **2·Y**, **3·Y**, **4·Y**, **5·Y** and **6·Y**

|                                                              | <b>1·Y</b>                                                                                     | <b>2·Y</b>                                                                     | <b>3·Y</b>                                                                     |
|--------------------------------------------------------------|------------------------------------------------------------------------------------------------|--------------------------------------------------------------------------------|--------------------------------------------------------------------------------|
| Formula                                                      | C <sub>50</sub> H <sub>47</sub> F <sub>3</sub> N <sub>10</sub> O <sub>12</sub> SY <sub>2</sub> | C <sub>51</sub> H <sub>54</sub> N <sub>10</sub> O <sub>11</sub> Y <sub>2</sub> | C <sub>50</sub> H <sub>46</sub> N <sub>10</sub> O <sub>11</sub> Y <sub>2</sub> |
| Mr (g mol <sup>-1</sup> )                                    | 1246.85                                                                                        | 1160.86                                                                        | 1140.79                                                                        |
| crystal system                                               | Monoclinic                                                                                     | Monoclinic                                                                     | Monoclinic                                                                     |
| space group                                                  | P 2 <sub>1</sub> /n                                                                            | P 2 <sub>1</sub> /n                                                            | P 2 <sub>1</sub> /n                                                            |
| T (K)                                                        | 100                                                                                            | 100                                                                            | 100                                                                            |
| <i>a</i> (Å)                                                 | 12.9095(3)                                                                                     | 12.9182(4)                                                                     | 13.0195(6)                                                                     |
| <i>b</i> (Å)                                                 | 28.744(3)                                                                                      | 28.6706(10)                                                                    | 28.4143(15)                                                                    |
| <i>c</i> (Å)                                                 | 15.0415(6)                                                                                     | 15.0341(5)                                                                     | 14.6931(7)                                                                     |
| $\alpha$ (°)                                                 | 90                                                                                             | 90                                                                             | 90                                                                             |
| $\beta$ (°)                                                  | 108.009(4)                                                                                     | 108.2140(10)                                                                   | 109.381(2)                                                                     |
| $\gamma$ (°)                                                 | 90                                                                                             | 90                                                                             | 90                                                                             |
| V (Å <sup>3</sup> )                                          | 5308.0(9)                                                                                      | 5289.2(3)                                                                      | 5127.5(4)                                                                      |
| Z                                                            | 4                                                                                              | 4                                                                              | 4                                                                              |
| $\rho_{\text{calcd.}}$ (g cm <sup>-3</sup> )                 | 1.560                                                                                          | 1.458                                                                          | 1.478                                                                          |
| $\mu$ (mm <sup>-1</sup> )                                    | 2.297                                                                                          | 2.252                                                                          | 2.321                                                                          |
| collected reflns                                             | 66465                                                                                          | 58883                                                                          | 76086                                                                          |
| unique reflns                                                | 9469                                                                                           | 10866                                                                          | 10527                                                                          |
| No. of parameters                                            | 689                                                                                            | 687                                                                            | 697                                                                            |
| Reflns for Refinement                                        | 66465                                                                                          | 58883                                                                          | 76086                                                                          |
| <i>R</i> ( <i>I</i> > 3 $\sigma$ ( <i>I</i> )) <sup>a</sup>  | 0.0677                                                                                         | 0.0357                                                                         | 0.0379                                                                         |
| <i>wR</i> ( <i>I</i> > 3 $\sigma$ ( <i>I</i> )) <sup>b</sup> | 0.1959                                                                                         | 0.0845                                                                         | 0.0922                                                                         |
| GOF on <i>F</i>                                              | 1.021                                                                                          | 1.015                                                                          | 1.047                                                                          |

  

|                                              | <b>4·Y</b>                                                       | <b>5·Y</b>                                                                     | <b>6·Y</b>                                                                                   |
|----------------------------------------------|------------------------------------------------------------------|--------------------------------------------------------------------------------|----------------------------------------------------------------------------------------------|
| Formula                                      | C <sub>46</sub> H <sub>39</sub> N <sub>10</sub> O <sub>4</sub> Y | C <sub>66</sub> H <sub>57</sub> N <sub>10</sub> O <sub>9</sub> PY <sub>2</sub> | C <sub>83</sub> H <sub>68</sub> N <sub>10</sub> O <sub>9</sub> P <sub>2</sub> Y <sub>2</sub> |
| Mr (g mol <sup>-1</sup> )                    | 884.78                                                           | 1343.00                                                                        | 1589.23                                                                                      |
| crystal system                               | Monoclinic                                                       | Triclinic                                                                      | Triclinic                                                                                    |
| space group                                  | P 2 <sub>1</sub> /c                                              | P -1                                                                           | P -1                                                                                         |
| T (K)                                        | 100                                                              | 150                                                                            | 100                                                                                          |
| <i>a</i> (Å)                                 | 19.6985(10)                                                      | 12.4890(5)                                                                     | 9.4938(5)                                                                                    |
| <i>b</i> (Å)                                 | 19.6817(10)                                                      | 15.6025(6)                                                                     | 24.7455(17)                                                                                  |
| <i>c</i> (Å)                                 | 25.6866(13)                                                      | 17.0019(7)                                                                     | 32.698(2)                                                                                    |
| $\alpha$ (°)                                 | 90                                                               | 96.001(2)                                                                      | 91.498(2)                                                                                    |
| $\beta$ (°)                                  | 102.249(2)                                                       | 103.8000(10)                                                                   | 96.674(2)                                                                                    |
| $\gamma$ (°)                                 | 90                                                               | 106.6320(10)                                                                   | 91.932(2)                                                                                    |
| V (Å <sup>3</sup> )                          | 9732.0(9)                                                        | 3029.1(2)                                                                      | 7621.8(8)                                                                                    |
| Z                                            | 8                                                                | 2                                                                              | 4                                                                                            |
| $\rho_{\text{calcd.}}$ (g cm <sup>-3</sup> ) | 1.208                                                            | 1.472                                                                          | 1.385                                                                                        |
| $\mu$ (mm <sup>-1</sup> )                    | 1.248                                                            | 2.000                                                                          | 1.622                                                                                        |
| collected reflns                             | 113555                                                           | 42238                                                                          | 154166                                                                                       |
| unique reflns                                | 19972                                                            | 10634                                                                          | 26652                                                                                        |
| No. of parameters                            | 1109                                                             | 801                                                                            | 2022                                                                                         |

|                         |        |        |        |
|-------------------------|--------|--------|--------|
| Reflns for Refinement   | 113555 | 42238  | 154166 |
| $R (I > 3\sigma(I))^a$  | 0.0897 | 0.0566 | 0.0711 |
| $wR (I > 3\sigma(I))^b$ | 0.2438 | 0.1560 | 0.1899 |
| GOF on $F$              | 1.045  | 1.177  | 1.027  |

<sup>a</sup>  $R = \Sigma||F_o| - |F_c||/\Sigma|F_o|$ , <sup>b</sup>  $wR = [\Sigma(w(F_o^2 - F_c^2)^2)/\Sigma ([w(F_o^2)^2]^{1/2})]$  where  $w = 1/(\sigma^2(F_o^2) + (aP)^2 + bP)$  with  $P = (2F_c^2 + \max(F_o^2, 0))/3$ .

**Table S6:** Selected crystallographic data and refinement parameters for **2·Er** and **5·Er**

|                                              | <b>2·Er</b>                                                                     | <b>5·Er</b>                                                                      |
|----------------------------------------------|---------------------------------------------------------------------------------|----------------------------------------------------------------------------------|
| Formula                                      | C <sub>51</sub> H <sub>54</sub> Er <sub>2</sub> N <sub>10</sub> O <sub>11</sub> | C <sub>66</sub> H <sub>57</sub> Er <sub>2</sub> N <sub>10</sub> O <sub>9</sub> P |
| Mr (g mol <sup>-1</sup> )                    | 1317.56                                                                         | 1499.70                                                                          |
| crystal system                               | Monoclinic                                                                      | Triclinic                                                                        |
| space group                                  | P 2 <sub>1</sub> /n                                                             | P -1                                                                             |
| T (K)                                        | 100                                                                             | 100                                                                              |
| $a$ (Å)                                      | 12.9022(3)                                                                      | 12.4588(7)                                                                       |
| $b$ (Å)                                      | 28.6292(8)                                                                      | 15.5778(8)                                                                       |
| $c$ (Å)                                      | 15.0283(4)                                                                      | 16.9491(9)                                                                       |
| $\alpha$ (°)                                 | 90                                                                              | 96.120(2)                                                                        |
| $\beta$ (°)                                  | 108.1800(2)                                                                     | 103.752(2)                                                                       |
| $\gamma$ (°)                                 | 90                                                                              | 106.503(2)                                                                       |
| V (Å <sup>3</sup> )                          | 5274.0(2)                                                                       | 3009.5(3)                                                                        |
| Z                                            | 4                                                                               | 2                                                                                |
| $\rho_{\text{calcd.}}$ (g cm <sup>-3</sup> ) | 1.659                                                                           | 1.655                                                                            |
| $\mu$ (mm <sup>-1</sup> )                    | 3.229                                                                           | 2.864                                                                            |
| collected reflns                             | 62454                                                                           | 95368                                                                            |
| unique reflns                                | 12082                                                                           | 12324                                                                            |
| No. of parameters                            | 689                                                                             | 801                                                                              |
| Reflns for Refinement                        | 62454                                                                           | 95368                                                                            |
| $R (I > 3\sigma(I))^a$                       | 0.0169                                                                          | 0.0171                                                                           |
| $wR (I > 3\sigma(I))^b$                      | 0.0405                                                                          | 0.0419                                                                           |
| GOF on $F$                                   | 1.033                                                                           | 1.073                                                                            |

<sup>a</sup>  $R = \Sigma||F_o| - |F_c||/\Sigma|F_o|$ , <sup>b</sup>  $wR = [\Sigma(w(F_o^2 - F_c^2)^2)/\Sigma ([w(F_o^2)^2]^{1/2})]$  where  $w = 1/(\sigma^2(F_o^2) + (aP)^2 + bP)$  with  $P = (2F_c^2 + \max(F_o^2, 0))/3$ .

**Table S7:** Selected bond lengths (Å) and bond angles (°) of the complexes **1·Y**, **2·Y**, **3·Y**, **4·Y**, **5·Y**, **6·Y**, **2·Er**, **6·Er**

**Complex 1·Y**

|        |          |        |          |        |          |        |          |
|--------|----------|--------|----------|--------|----------|--------|----------|
| Y1 O4  | 2.318(5) | Y1 O1  | 2.294(5) | Y1 O3  | 2.358(5) | Y1 O2  | 2.305(5) |
| Y1 O8  | 2.321(5) | Y1 N3  | 2.476(5) | Y1 N4  | 2.444(6) | Y1 N2  | 2.503(6) |
| Y2 O7  | 2.258(5) | Y2 O6  | 2.293(5) | Y2 O5  | 2.375(5) | Y2 O3  | 2.378(5) |
| Y2 O9  | 2.396(5) | Y2 N7  | 2.461(6) | Y2 N9  | 2.450(6) | Y2 N8  | 2.454(6) |
| O7 C34 | 1.285(8) | O6 C41 | 1.276(8) | O5 C24 | 1.256(9) | O4 C24 | 1.291(8) |
| O1 C17 | 1.267(8) | O3 C24 | 1.311(8) | O2 C10 | 1.304(8) | N9 N10 | 1.392(8) |
| N6 N7  | 1.384(8) | N5 N4  | 1.383(8) | N1 N2  | 1.387(8) |        |          |

|           |           |            |           |           |           |
|-----------|-----------|------------|-----------|-----------|-----------|
| O1 Y1 N2  | 63.89(17) | Y1 O3 Y2   | 172.6(2)  | O2 Y1 N4  | 64.55(17) |
| N4 Y1 N3  | 64.54(18) | N3 Y1 N2   | 63.71(18) | O7 Y2 N9  | 65.97(19) |
| O6 Y2 N7  | 64.70(19) | N8 Y2 N7   | 64.2(2)   | N9 Y2 N8  | 64.42(19) |
| C41 N6 N7 | 108.8(5)  | C34 N10 N9 | 109.4(6)  | C17 N1 N2 | 112.4(5)  |
| C10 N5 N4 | 110.3(6)  |            |           |           |           |

**Complex 2·Y**

|        |            |        |            |        |            |        |            |
|--------|------------|--------|------------|--------|------------|--------|------------|
| Y1 O4  | 2.3168(18) | Y1 O1  | 2.2464(17) | Y1 O3  | 2.3772(18) | Y1 O2  | 2.3167(17) |
| Y1 O8  | 2.3221(18) | Y1 N3  | 2.475(2)   | Y1 N4  | 2.450(2)   | Y1 N2  | 2.484(2)   |
| Y2 O7  | 2.2539(18) | Y2 O6  | 2.2793(18) | Y2 O5  | 2.3620(17) | Y2 O3  | 2.3679(18) |
| Y2 O9  | 2.4056(18) | Y2 N7  | 2.452(2)   | Y2 N9  | 2.448(2)   | Y2 N8  | 2.453(2)   |
| O7 C34 | 1.286(3)   | O6 C41 | 1.280(3)   | O5 C24 | 1.260(3)   | O4 C24 | 1.275(3)   |
| O1 C17 | 1.283(3)   | O3 C24 | 1.319(3)   | O2 C10 | 1.294(3)   | N9 N10 | 1.384(3)   |
| N7 N6  | 1.394(3)   | N4 N5  | 1.393(3)   | N1 N2  | 1.397(3)   |        |            |

|            |          |           |           |           |          |
|------------|----------|-----------|-----------|-----------|----------|
| O1 Y1 N2   | 64.30(6) | Y2 O3 Y1  | 174.80(9) | O2 Y1 N4  | 64.23(6) |
| N4 Y1 N3   | 64.23(7) | N3 Y1 N2  | 64.14(7)  | O7 Y2 N9  | 65.71(7) |
| O6 Y2 N7   | 65.01(7) | N7 Y2 N8  | 63.92(7)  | N9 Y2 N8  | 64.57(7) |
| C10 N5 N4  | 109.6(2) | C17 N1 N2 | 108.5(2)  | C41 N6 N7 | 108.4(2) |
| C34 N10 N9 | 109.1(2) |           |           |           |          |

**Complex 3·Y**

|        |          |        |          |        |          |        |          |
|--------|----------|--------|----------|--------|----------|--------|----------|
| Y1 O4  | 2.348(2) | Y1 O1  | 2.278(2) | Y1 O3  | 2.367(2) | Y1 O2  | 2.295(2) |
| Y1 O8  | 2.385(2) | Y1 N3  | 2.447(3) | Y1 N4  | 2.431(3) | Y1 N2  | 2.448(2) |
| Y2 O7  | 2.279(2) | Y2 O6  | 2.306(2) | Y2 O5  | 2.321(2) | Y2 O3  | 2.383(2) |
| Y2 O9  | 2.374(2) | Y2 N7  | 2.419(2) | Y2 N9  | 2.458(2) | Y2 N8  | 2.450(2) |
| O7 C34 | 1.292(4) | O6 C41 | 1.289(3) | O5 C24 | 1.272(4) | O4 C24 | 1.262(3) |
| O1 C17 | 1.295(4) | O3 C24 | 1.315(3) | O2 C10 | 1.277(4) | N9 N10 | 1.393(3) |
| N6 N7  | 1.388(3) | N4 N5  | 1.390(4) | N1 N2  | 1.391(3) |        |          |

|            |          |           |            |           |          |
|------------|----------|-----------|------------|-----------|----------|
| O1 Y1 N2   | 65.37(8) | Y1 O3 Y2  | 175.92(10) | O2 Y1 N4  | 65.24(8) |
| N4 Y1 N3   | 64.37(9) | N3 Y1 N2  | 64.53(9)   | O7 Y2 N9  | 64.78(8) |
| O6 Y2 N7   | 65.10(8) | N7 Y2 N8  | 64.98(8)   | N8 Y2 N9  | 64.62(8) |
| C10 N5 N4  | 108.8(3) | C17 N1 N2 | 109.7(2)   | C41 N6 N7 | 109.5(2) |
| C34 N10 N9 | 109.2(2) |           |            |           |          |

### Complex 4·Y

|                  |                 |                 |                 |
|------------------|-----------------|-----------------|-----------------|
| O2 C10 1.276(8)  | N4 N5 1.384(7)  | Y1 O2 2.451(4)  | Y1 N4 2.514(5)  |
| Y1 N3 2.638(5)   | N1 N2 1.380(7)  | Y1 N2 2.553(5)  | O1 C17 1.280(7) |
| O4 C33 1.259(8)  | N10 N9 1.400(7) | Y1 O4 2.505(4)  | Y1 N9 2.554(5)  |
| Y1 N8 2.618(5)   | Y1 O1 2.377(4)  | Y1 N7 2.494(5)  | N6 N7 1.383(8)  |
| O3 C40 1.265(7)  | Y1 O3 2.333(4)  | O7 C56 1.261(7) | Y2 O7 2.390(4)  |
| N20 N21 1.418(7) | Y2 N20 2.491(5) | Y2 N19 2.646(5) | Y2 N17 2.567(5) |
| N16 N17 1.392(7) | O8 C63 1.227(7) | Y2 O8 2.506(4)  | O5 C79 1.273(7) |

|                      |                      |                      |
|----------------------|----------------------|----------------------|
| O7 Y2 N20 62.28(16)  | O8 Y2 N17 60.41(15)  | N20 Y2 N19 60.73(17) |
| N17 Y2 N19 59.51(16) | O5 Y2 N12 61.16(15)  | N12 Y2 N13 60.64(15) |
| N14 Y2 N13 61.68(15) | O6 Y2 N14 62.06(15)  | O4 Y1 N9 60.36(16)   |
| N9 Y1 N8 60.31(17)   | N7 Y1 N8 62.05       | O3 Y1 N7 62.51(16)   |
| O2 Y1 N4 60.75(17)   | N4 Y1 N3 61.16(16)   | N2 Y1 N3 60.52(15)   |
| O1 Y1 N2 61.11(15)   | C17 N1 N2 108.5(5)   | C10 N5 N4 107.5(5)   |
| C40 N6 N7 106.9(5)   | C33 N10 N9 113.9(5)  | C86 N15 N14 107.4(5) |
| C79 N11 N12 108.0(5) | C56 N21 N20 107.8(5) | C63 N16 N17 113.7(5) |

### Complex 5·Y

|                 |                 |                 |                 |
|-----------------|-----------------|-----------------|-----------------|
| Y1 O4 2.314(4)  | Y1 O1 2.248(4)  | Y1 O3 2.386(4)  | Y1 O2 2.319(4)  |
| Y1 O8 2.342(4)  | Y1 N3 2.484(5)  | Y1 N4 2.458(4)  | Y1 N2 2.483(5)  |
| Y2 O7 2.265(4)  | Y2 O6 2.301(4)  | Y2 O5 2.376(4)  | Y2 O3 2.389(4)  |
| Y2 O9 2.323(4)  | Y2 N7 2.462(5)  | Y2 N9 2.468(5)  | Y2 N8 2.486(5)  |
| O7 C34 1.289(7) | O6 C41 1.271(7) | O5 C24 1.263(7) | O4 C24 1.265(7) |
| O1 C17 1.282(7) | O3 C24 1.321(6) | O2 C10 1.293(7) | N10 N9 1.389(6) |
| N6 N7 1.388(7)  | N4 N5 1.398(6)  | N1 N2 1.391(6)  |                 |

|                    |                     |                     |
|--------------------|---------------------|---------------------|
| O1 Y1 N2 64.24(14) | Y1 O3 Y2 175.53(19) | O2 Y1 N4 63.80(14)  |
| N4 Y1 N3 64.06(15) | N2 Y1 N3 63.94(15)  | O7 Y2 N9 65.03(15)  |
| O6 Y2 N7 64.77(14) | N7 Y2 N8 64.00(15)  | N9 Y2 N8 63.92(15)  |
| C10 N5 N4 108.7(4) | C17 N1 N2 107.9(4)  | C34 N10 N9 109.5(5) |
| C41 N6 N7 108.7(4) |                     |                     |

### Complex 6·Y

|                   |                   |                   |                   |
|-------------------|-------------------|-------------------|-------------------|
| Y4 O15 2.371(4)   | Y4 O16 2.249(4)   | Y4 O14 2.228(5)   | Y4 O18 2.300(5)   |
| Y4 O12 2.390(5)   | Y4 N19 2.426(5)   | Y4 N18 2.443(5)   | Y4 N17 2.438(5)   |
| Y3 O17 2.315(5)   | Y3 O10 2.339(4)   | Y3 O12 2.381(5)   | Y3 O13 2.263(5)   |
| Y3 N13 2.443(6)   | Y3 O11 2.294(5)   | Y3 N12 2.451(6)   | Y3 N14 2.482(7)   |
| Y1 O8 2.280(4)    | Y1 O1 2.269(4)    | Y1 O3 2.374(4)    | Y1 O2 2.379(4)    |
| Y1 N2 2.459(4)    | Y1 O4 2.234(5)    | Y1 N4 2.447(5)    | Y1 N3 2.453(4)    |
| Y2 O3 2.347(4)    | Y2 O6 2.280(4)    | Y2 O9 2.305(4)    | Y2 O7 2.303(5)    |
| Y2 O5 2.282(5)    | Y2 O7 2.303(5)    | Y2 N8 2.453(5)    | Y2 N9 2.426(5)    |
| O15 C124 1.271(7) | O16 C117 1.295(7) | O14 C107 1.292(8) | O12 C107 1.296(7) |
| O1 C17 1.290(6)   | O10 C100 1.286(7) | O3 C47 1.267(7)   | O2 C10 1.285(7)   |
| N19 N20 1.399(8)  | C107 O13 1.248(8) | N11 N12 1.390(8)  | N2 N1 1.392(6)    |
| N16 N17 1.389(7)  | N7 N6 1.391(7)    | N5 N4 1.392(6)    | O11 C93 1.286(9)  |
| N9 N10 1.377(7)   | O6 C40 1.272(7)   | O7 C33 1.288(9)   | O4 C47 1.288(7)   |



O3 C47 1.267(7) N14 N15 1.387(10)

|             |           |              |           |              |           |
|-------------|-----------|--------------|-----------|--------------|-----------|
| O1 Y1 N2    | 65.59(14) | Y2 O3 Y1     | 176.3(2)  | O2 Y1 N4     | 63.76(14) |
| N4 Y1 N3    | 64.73(15) | O7 Y2 N9     | 64.88(18) | O6 Y2 N7     | 63.82(15) |
| N8 Y2 N7    | 65.06(17) | N9 Y2 N8     | 65.37(18) | N3 Y1 N2     | 64.58(15) |
| O10 Y3 N12  | 63.89(16) | N13 Y3 N12   | 64.3(2)   | N13 Y3 N14   | 65.4(3)   |
| O11 Y3 N14  | 63.4(2)   | Y3 O12 Y4    | 168.1(3)  | O15 Y4 N17   | 63.80(16) |
| N17 Y4 N18  | 64.61(18) | N19 Y4 N18   | 65.5(2)   | O16 Y4 N19   | 66.26(17) |
| C10 N5 N4   | 109.1(4)  | C17 N1 N2    | 109.5(4)  | C33 N10 N9   | 110.3(6)  |
| C40 N6 N7   | 108.5(5)  | C117 N20 N19 | 109.5(5)  | C124 N16 N17 | 108.0(5)  |
| C93 N15 N14 | 109.0(7)  | C100 N11 N12 | 109.3(5)  |              |           |

### Complex 2·Er

|        |            |        |            |        |            |        |            |
|--------|------------|--------|------------|--------|------------|--------|------------|
| Er1 O4 | 2.3536(13) | Er1 O1 | 2.2498(13) | Er1 O3 | 2.3615(13) | Er1 O2 | 2.2776(13) |
| Er1 O8 | 2.3994(13) | Er1 N3 | 2.4320(16) | Er1 N4 | 2.4418(16) | Er1 N2 | 2.4313(16) |
| Er2 O7 | 2.2445(12) | Er2 O6 | 2.3089(13) | Er2 O5 | 2.3080(13) | Er2 O3 | 2.3742(13) |
| Er2 O9 | 2.3130(13) | Er2 N7 | 2.4341(15) | Er2 N9 | 2.4747(16) | Er2 N8 | 2.4610(15) |
| O7 C34 | 1.278(2)   | O6 C41 | 1.298(2)   | O5 C24 | 1.275(2)   | O4 C24 | 1.265(2)   |
| O1 C17 | 1.289(2)   | O3 C24 | 1.315(2)   | O2 C10 | 1.280(2)   | N10 N9 | 1.395(2)   |
| N6 N7  | 1.392(2)   | N4 N5  | 1.387(2)   | N1 N2  | 1.387(2)   |        |            |

|           |            |            |            |            |            |
|-----------|------------|------------|------------|------------|------------|
| O1 Er1 N2 | 65.98(5)   | Er1 O3 Er2 | 175.06(6)  | O2 Er1 N4  | 65.22(5)   |
| N3 Er1 N4 | 64.32(5)   | N2 Er1 N3  | 65.00(5)   | O7 Er2 N9  | 64.62(5)   |
| O6 Er2 N7 | 64.56(5)   | N7 Er2 N8  | 64.54(5)   | N8 Er2 N9  | 64.42(5)   |
| C10 N5 N4 | 108.29(16) | C17 N1 N2  | 109.22(15) | C34 N10 N9 | 108.57(15) |
| C41 N6 N7 | 109.42(15) |            |            |            |            |

### Complex 5·Er

|        |            |        |            |        |            |        |            |
|--------|------------|--------|------------|--------|------------|--------|------------|
| Er1 O4 | 2.3115(13) | Er1 O1 | 2.3050(13) | Er1 O3 | 2.3833(13) | Er1 O2 | 2.2451(13) |
| Er1 O8 | 2.3341(13) | Er1 N3 | 2.4674(16) | Er1 N4 | 2.4699(16) | Er1 N2 | 2.4442(15) |
| Er2 O7 | 2.2939(13) | Er2 O6 | 2.2578(13) | Er2 O5 | 2.3660(14) | Er2 O3 | 2.3852(13) |
| Er2 O9 | 2.3146(14) | Er2 N7 | 2.4482(16) | Er2 N9 | 2.4451(15) | Er2 N8 | 2.4607(15) |
| O7 C34 | 1.275(2)   | O6 C41 | 1.283(2)   | O5 C24 | 1.268(2)   | O4 C24 | 1.274(2)   |
| O1 C17 | 1.297(2)   | O3 C24 | 1.316(2)   | O2 C10 | 1.287(2)   | N9 N10 | 1.391(2)   |
| N7 N6  | 1.390(2)   | N5 N4  | 1.394(2)   | N1 N2  | 1.389(2)   |        |            |

|           |            |            |            |            |            |
|-----------|------------|------------|------------|------------|------------|
| O1 Er1 N2 | 64.28(5)   | Er1 O3 Er2 | 176.08(6)  | O2 Er1 N4  | 64.82(5)   |
| N3 Er1 N4 | 64.09(5)   | N2 Er1 N3  | 64.40(5)   | O7 Er2 N9  | 65.09(5)   |
| O6 Er2 N7 | 65.25(5)   | N7 Er2 N8  | 64.39(5)   | N9 Er2 N8  | 64.22(5)   |
| C10 N5 N4 | 108.71(15) | C17 N1 N2  | 109.37(15) | C34 N10 N9 | 108.68(15) |
| C41 N6 N7 | 108.64(15) |            |            |            |            |

**Table S8:** The outputs from the *Continuous Shape Measures* (CShM's) analyses employing the SHAPE program based on the Pinsky-Avnir algorithm for the calculation of continuous shape measures for the **1·Y-6·Y**, **2·Er** and **5·Er** octacoordinated fragments around the Ln centers in the complexes with highlighted closest geometry (minimal distortion paths values) for each metal center.

Complex **1·Y**

| Metal Centre Polyhedron* | Y1           | Y2           |
|--------------------------|--------------|--------------|
| OP-8                     | 34.420       | 32.442       |
| HPY-8                    | 23.505       | 22.509       |
| HBPY-8                   | 11.352       | 16.356       |
| CU-8                     | 9.252        | 14.007       |
| SAPR-8                   | 4.411        | 4.777        |
| TDD-8                    | 3.928        | <b>2.816</b> |
| JGBF-8                   | 9.442        | 12.311       |
| JETBPY-8                 | 24.811       | 26.112       |
| JBTPR-8                  | 4.380        | 3.968        |
| BTPR-8                   | <b>3.698</b> | 3.314        |
| JSD-8                    | 5.401        | 4.772        |
| TT-8                     | 10.098       | 14.535       |
| ETBPY-8                  | 22.266       | 23.011       |

Complex **2·Y**

| Metal Centre Polyhedron* | Y1           | Y2           |
|--------------------------|--------------|--------------|
| OP-8                     | 34.078       | 32.213       |
| HPY-8                    | 23.679       | 22.488       |
| HBPY-8                   | 11.699       | 16.804       |
| CU-8                     | 9.670        | 13.819       |
| SAPR-8                   | 4.381        | 4.686        |
| TDD-8                    | 4.026        | <b>2.832</b> |
| JGBF-8                   | 9.351        | 12.813       |
| JETBPY-8                 | 25.036       | 26.378       |
| JBTPR-8                  | 4.285        | 3.952        |
| BTPR-8                   | <b>3.604</b> | 3.293        |
| JSD-8                    | 5.069        | 4.826        |
| TT-8                     | 10.500       | 14.345       |
| ETBPY-8                  | 22.513       | 23.295       |

### Complex 3·Y

| Metal Centre Polyhedron* | Y1           | Y2           |
|--------------------------|--------------|--------------|
| OP-8                     | 33.109       | 34.588       |
| HPY-8                    | 21.992       | 23.439       |
| HBPY-8                   | 16.615       | 12.701       |
| CU-8                     | 14.019       | 10.425       |
| SAPR-8                   | 5.232        | 4.452        |
| TDD-8                    | <b>2.919</b> | 3.702        |
| JGBF-8                   | 12.501       | 10.061       |
| JETBPY-8                 | 25.542       | 25.104       |
| JBTPR-8                  | 4.231        | 4.113        |
| BTPR-8                   | 3.630        | <b>3.299</b> |
| JSD-8                    | 4.702        | 4.985        |
| TT-8                     | 14.605       | 11.237       |
| ETBPY-8                  | 22.524       | 22.350       |

### Complex 5·Y

| Metal Centre Polyhedron* | Y1           | Y2           |
|--------------------------|--------------|--------------|
| OP-8                     | 31.751       | 33.723       |
| HPY-8                    | 23.206       | 23.116       |
| HBPY-8                   | 11.990       | 14.436       |
| CU-8                     | 10.343       | 12.630       |
| SAPR-8                   | 4.930        | 5.299        |
| TDD-8                    | <b>3.634</b> | <b>3.274</b> |
| JGBF-8                   | 9.413        | 10.507       |
| JETBPY-8                 | 25.055       | 25.041       |
| JBTPR-8                  | 4.482        | 4.678        |
| BTPR-8                   | 3.795        | 3.974        |
| JSD-8                    | 4.618        | 4.766        |
| TT-8                     | 11.111       | 13.336       |
| ETBPY-8                  | 22.295       | 22.084       |

### Complex 6·Y

| Metal Centre Polyhedron* | Y1           | Y2     | Y3           | Y4           |
|--------------------------|--------------|--------|--------------|--------------|
| OP-8                     | 32.430       | 32.915 | 32.297       | 32.385       |
| HPY-8                    | 22.976       | 22.287 | 22.716       | 22.518       |
| HBPY-8                   | 12.230       | 10.645 | 11.518       | 13.441       |
| CU-8                     | 11.011       | 9.357  | 11.005       | 12.265       |
| SAPR-8                   | 4.814        | 5.275  | 5.486        | 5.120        |
| TDD-8                    | <b>3.156</b> | 3.848  | <b>3.668</b> | <b>2.887</b> |
| JGBF-8                   | 9.687        | 9.772  | 8.906        | 10.480       |
| JETBPY-8                 | 23.878       | 24.744 | 23.344       | 24.346       |

|         |        |              |        |        |
|---------|--------|--------------|--------|--------|
| JBTPR-8 | 4.703  | 4.365        | 5.062  | 4.156  |
| BTPR-8  | 4.208  | <b>3.599</b> | 4.602  | 3.711  |
| JSD-8   | 4.433  | 5.698        | 4.833  | 4.386  |
| TT-8    | 11.523 | 10.036       | 11.672 | 12.699 |
| ETBPY-8 | 21.242 | 22.175       | 20.197 | 21.515 |

### Complex 2·Er

| Metal Centre Polyhedron* | Er1          | Er2          |
|--------------------------|--------------|--------------|
| OP-8                     | 32.167       | 34.198       |
| HPY-8                    | 22.494       | 23.677       |
| HBPY-8                   | 16.869       | 11.820       |
| CU-8                     | 13.580       | 9.779        |
| SAPR-8                   | 4.559        | 4.304        |
| TDD-8                    | <b>2.722</b> | 3.901        |
| JGBF-8                   | 12.928       | 9.411        |
| JETBPY-8                 | 26.610       | 25.184       |
| JBTPR-8                  | 3.865        | 4.172        |
| BTPR-8                   | 3.201        | <b>3.490</b> |
| JSD-8                    | 4.772        | 4.964        |
| TT-8                     | 14.129       | 10.607       |
| ETBPY-8                  | 23.520       | 22.665       |

### Complex 5·Er

| Metal Centre Polyhedron* | Er1          | Er2          |
|--------------------------|--------------|--------------|
| OP-8                     | 31.913       | 33.768       |
| HPY-8                    | 23.129       | 23.248       |
| HBPY-8                   | 12.155       | 14.483       |
| CU-8                     | 10.480       | 12.646       |
| SAPR-8                   | 4.829        | 5.180        |
| TDD-8                    | <b>3.460</b> | <b>3.154</b> |
| JGBF-8                   | 9.537        | 10.571       |
| JETBPY-8                 | 25.292       | 25.248       |
| JBTPR-8                  | 4.348        | 4.576        |
| BTPR-8                   | 3.629        | 3.853        |
| JSD-8                    | 4.501        | 4.691        |
| TT-8                     | 11.254       | 13.367       |
| ETBPY-8                  | 22.509       | 22.281       |

\* OP-8: Octagon (D<sub>8h</sub>); HPY-8: Heptagonal pyramid (C<sub>7v</sub>); HBPY-8: Hexagonal bipyramid (D<sub>6h</sub>); CU-8: Cube (O<sub>h</sub>); SAPR-8: Square antiprism (D<sub>4d</sub>); TDD-8: Triangular dodecahedron (D<sub>2d</sub>); JGBF-8: Johnson gyrobifastigium J<sub>26</sub> (D<sub>2d</sub>); JETBPY-8: Johnson elongated triangular bipyramid J<sub>14</sub> (D<sub>3h</sub>); JBTPR-8: Biaugmented trigonal prism J<sub>50</sub> (C<sub>2v</sub>); BTPR-8: Biaugmented trigonal prism (C<sub>2v</sub>); JSD-8: Snub diphenoid J<sub>84</sub> (D<sub>2d</sub>); TT-8: Triakis tetrahedron (T<sub>d</sub>); ETBPY-8: Elongated trigonal bipyramid (D<sub>3h</sub>).

**Ref:**

1. Lorenzini, C., Pelizzi, C., Pelizzi, G., & Predieri, G., *Journal of the Chemical Society, Dalton Transactions* **1983**, 4, 721-727.
2. Dubovan, L., Pollnitz, A., Silvestru, C. *Eur. J. Inorg. Chem.* **2016**, 10, 1521–1527.
3. *International Tables for Crystallography*.
4. M. Décultot, A. Ledoux, M.-C. Fournier-Salaün, L. Estel, *J. Chem. Thermodyn.* **2019**, 138, 67-77.
